# Supplementary material for: Practical synthesis and biological screening of sulfonyl hydrazides
Source: Royal Society of Chemistry journal article supplement (doi:10.1039/d2ob02160a), 2022-12-21
Supplement: d2ob02160a1.pdf [file d2ob02160a1.pdf]

## Electronic Supporting Information

### Practical Synthesis and Biological Screening of Sulfonyl hydrazides

João Macara,<sup>a</sup> Catarina Caldeira,<sup>a</sup> José Cunha,<sup>a</sup> Jaime A. S. Coelho,<sup>b</sup> Maria J. S. A. Silva,<sup>c</sup> Konrad Krämer,<sup>d,e</sup>  
Christoph W. Grathwol,<sup>d,e</sup> Stefan Bräse,<sup>d,e</sup> M. Manuel B. Marques<sup>a\*</sup>

<sup>a</sup> LAQV@REQUIMTE, Departamento de Química, NOVA School of Science and Technology, Universidade Nova de Lisboa, Campus de Caparica, 2829-516 Caparica, Portugal E-mail: mmbmarques@fct.unl.pt

<sup>b</sup> Centro de Química Estrutural, Faculdade de Ciências, Universidade de Lisboa, Campo Grande, Lisboa 1749-016, Portugal

<sup>c</sup> Research Institute for Medicines (iMed.Ulisboa), Faculty of Pharmacy, Universidade de Lisboa, Av. Prof. Gama Pinto, 1649-003, Lisboa, Portugal

<sup>d</sup> Institute of Organic Chemistry, Organic Chemistry I, Fritz-Haber-Weg 6, 76131 Karlsruhe, Germany

<sup>e</sup> Institute of Biological and Chemical Systems – Functional Molecular Systems (IBCS–FMS), Hermann-von-Helmholtz-Platz 1, D-76344 Eggenstein-Leopoldshafen, Germany

## Index

|                                                                                                                          |    |
|--------------------------------------------------------------------------------------------------------------------------|----|
| 1. Complementary experiments.....                                                                                        | 4  |
| 1.1. Control experiments.....                                                                                            | 4  |
| 2. <sup>1</sup> H and <sup>13</sup> C spectra .....                                                                      | 6  |
| 2.1. <sup>1</sup> H NMR (CDCl <sub>3</sub> , 400 MHz) of 1-chloro-1,2-benziodoxol-3-(1 <i>H</i> )-one (1) .....          | 6  |
| 2.2. <sup>13</sup> C NMR (CDCl <sub>3</sub> , 400 MHz) of 1-chloro-1,2-benziodoxol-3-(1 <i>H</i> )-one (1) .....         | 6  |
| 2.3. <sup>1</sup> H NMR (CDCl <sub>3</sub> , 400 MHz) of 1,2-dimorpholinodiazene (5).....                                | 7  |
| 2.4. <sup>13</sup> C NMR (CDCl <sub>3</sub> , 400 MHz) of 1,2-dimorpholinodiazene (5).....                               | 7  |
| 2.5. <sup>1</sup> H NMR (CDCl <sub>3</sub> , 400 MHz) of N-morpholinobenzenesulfonamide (4aa) .....                      | 8  |
| 2.6. <sup>13</sup> C NMR (CDCl <sub>3</sub> , 400 MHz) of N-morpholinobenzenesulfonamide (4aa) .....                     | 8  |
| 2.7. <sup>1</sup> H NMR (CDCl <sub>3</sub> , 400 MHz) of N'-methyl-N'-phenylbenzenesulfonohydrazide (4ab) .....          | 9  |
| 2.8. <sup>13</sup> C NMR (CDCl <sub>3</sub> , 400 MHz) of N'-methyl-N'-phenylbenzenesulfonohydrazide (4ab) .....         | 9  |
| 2.9. <sup>1</sup> H NMR (CDCl <sub>3</sub> , 400 MHz) of 4-methyl-N-morpholinobenzenesulfonamide (4ba) .....             | 10 |
| 2.10. <sup>13</sup> C NMR (CDCl <sub>3</sub> , 400 MHz) of 4-methyl-N-morpholinobenzenesulfonamide (4ba) .....           | 10 |
| 2.11. <sup>1</sup> H NMR (CDCl <sub>3</sub> , 400 MHz) of N-Methyl-N-phenyl-N'-p-toluolsulfonyl-hydrazin (4bb).....      | 11 |
| 2.12. <sup>13</sup> C NMR (CDCl <sub>3</sub> , 400 MHz) of N-Methyl-N-phenyl-N'-p-toluolsulfonyl-hydrazin (4bb).....     | 11 |
| 2.13. <sup>1</sup> H NMR (CDCl <sub>3</sub> , 400 MHz) of N'-methyl-N'-phenylmethanesulfonohydrazide (4cb) .....         | 12 |
| 2.14. <sup>13</sup> C NMR (CDCl <sub>3</sub> , 400 MHz) of N'-methyl-N' phenylmethanesulfonohydrazide (4cb).....         | 12 |
| 2.15. <sup>1</sup> H NMR (CDCl <sub>3</sub> , 400 MHz) of N'-methyl-N'-phenylnaphthalene-2-sulfonohydrazide (4db) .....  | 13 |
| 2.16. <sup>13</sup> C NMR (CDCl <sub>3</sub> , 400 MHz) of N'-methyl-N'-phenylnaphthalene-2-sulfonohydrazide (4db) ..... | 13 |
| 2.17. <sup>1</sup> H NMR (CDCl <sub>3</sub> , 400 MHz) of N'-methyl-N'-phenylpyridin-2-sulfonohydrazide (4eb) .....      | 14 |
| 2.18. <sup>13</sup> C NMR (CDCl <sub>3</sub> , 400 MHz) of N'-methyl-N'-phenylpyridin-2-sulfonohydrazide (4eb) .....     | 14 |
| 2.19. <sup>1</sup> H NMR (CDCl <sub>3</sub> , 400 MHz) of N-(piperidin-1-yl)benzenesulfonamide (4ac) .....               | 15 |
| 2.20. <sup>13</sup> C NMR (CDCl <sub>3</sub> , 400 MHz) of N-(piperidin-1-yl)benzenesulfonamide (4ac) .....              | 15 |
| 2.21. <sup>1</sup> H NMR (CDCl <sub>3</sub> , 400 MHz) of 4-methyl-N-(piperidin-1 yl) benzenesulfonamide (4bc).....      | 16 |
| 2.22. <sup>13</sup> C NMR (CDCl <sub>3</sub> , 400 MHz) of 4-methyl-N-(piperidin-1 yl) benzenesulfonamide (4bc).....     | 16 |
| 2.23. <sup>1</sup> H NMR (CDCl <sub>3</sub> , 400 MHz) of 2-Benzolsulfonyl-1,1-dimethyl-hydrazin (4ad).....              | 17 |
| 2.24. <sup>13</sup> C NMR (CDCl <sub>3</sub> , 400 MHz) of 2-Benzolsulfonyl-1,1-dimethyl-hydrazin (4ad).....             | 17 |
| 2.25. <sup>1</sup> H NMR (CDCl <sub>3</sub> , 400 MHz) of N,N-Dimethyl-4-toluenesulfonylhydrazide (4bd).....             | 18 |
| 2.26. <sup>13</sup> C NMR (CDCl <sub>3</sub> , 400 MHz) of N,N-Dimethyl-4-toluenesulfonylhydrazide (4bd).....            | 18 |
| 2.27. <sup>1</sup> H NMR (CDCl <sub>3</sub> , 400 MHz) of N',N'-diphenylbenzenesulfonohydrazide (4ae).....               | 19 |
| 2.28. <sup>13</sup> C NMR (CDCl <sub>3</sub> , 400 MHz) of N',N'-diphenylbenzenesulfonohydrazide (4ae).....              | 19 |
| 2.29. <sup>1</sup> H NMR (CDCl <sub>3</sub> , 400 MHz) of 4-methyl-N',N'diphenylbenzene sulfonylhydrazide (4be).....     | 20 |

|                                                                                                                   |    |
|-------------------------------------------------------------------------------------------------------------------|----|
| 2.30. <sup>13</sup> C NMR (CDCl <sub>3</sub> , 400 MHz) of 4-methyl-N',N'-diphenylbenzene sulfonylhydrazide (4be) | 20 |
| 2.31. <sup>1</sup> H NMR (CDCl <sub>3</sub> , 400 MHz) of 1-methanesulfonyl-2-phenylhydrazine (4ce)               | 21 |
| 2.32. <sup>13</sup> C NMR (CDCl <sub>3</sub> , 400 MHz) of 1-methanesulfonyl-2-phenylhydrazine (4ce)              | 21 |
| 2.33. <sup>1</sup> H NMR (CDCl <sub>3</sub> , 400 MHz) of N'-(3-chlorophenyl)benzenesulfonohydrazide (4af)        | 22 |
| 2.34. <sup>13</sup> C NMR (CDCl <sub>3</sub> , 400 MHz) of N'-(3-chlorophenyl)benzenesulfonohydrazide (4af)       | 22 |
| 2.35. <sup>1</sup> H NMR (CDCl <sub>3</sub> , 400 MHz) of N'-(3-chlorophenyl)methanesulfonohydrazide (4cf)        | 23 |
| 2.36. <sup>13</sup> C NMR (CDCl <sub>3</sub> , 400 MHz) of N'-(3-chlorophenyl)methanesulfonohydrazide (4cf)       | 23 |
| 2.37. <sup>1</sup> H NMR (CDCl <sub>3</sub> , 400 MHz) of 4-methyl-N'-(m-tolyl)benzene sulfonohydrazide (4bg)     | 24 |
| 2.38. <sup>13</sup> C NMR (CDCl <sub>3</sub> , 400 MHz) of 4-methyl-N'-(m-tolyl)benzene sulfonohydrazide (4bg)    | 24 |
| 2.39. <sup>1</sup> H NMR (CDCl <sub>3</sub> , 400 MHz) of 4-(pyridin-2-ylsulfonyl)morpholine (6ea)                | 25 |
| 3. IR Spectra                                                                                                     | 26 |
| 3.1. IR spectra of 1-chloro-1,2-benziodoxol-3-(1H)-one (1)                                                        | 26 |
| 3.2. IR spectra of N-morpholinobenzenesulfonamide (4aa)                                                           | 26 |
| 3.3. IR spectra of N'-methyl-N'-phenylbenzenesulfonohydrazide (4ab)                                               | 26 |
| 3.4. IR spectra of 1,2-dimorpholinodiazene (5)                                                                    | 27 |
| 3.5. IR spectra of N-morpholinobenzenesulfonamide (4ba)                                                           | 27 |
| 3.6. IR spectra of N'-Methyl-N-phenyl-N'-p-toluolsulfonyl-hydrazin (4bb)                                          | 27 |
| 3.7. IR spectra of N'-methyl-N'-phenylmethanesulfonohydrazide (4cb)                                               | 28 |
| 3.8. IR spectra of N'-methyl-N'-phenyl-naphthalene-2-sulfonohydrazide (4db)                                       | 28 |
| 3.9. IR spectra of N'-methyl-N'-phenylpyridin-2-sulfonohydrazide (4eb)                                            | 28 |
| 3.10. IR spectra of N-(piperidin-1-yl)benzenesulfonamide (4ac)                                                    | 29 |
| 3.11. IR spectra of 4-methyl-N-(piperidin-1-yl)benzenesulfonamide (4bc)                                           | 29 |
| 3.12. IR spectra of 2-Benzolsulfonyl-1,1-dimethyl-hydrazin (4ad)                                                  | 29 |
| 3.13. IR spectra of N,N-Dimethyl-4-toluenesulfonylhydrazide (4bd)                                                 | 30 |
| 3.14. IR spectra of N',N'-diphenylbenzenesulfonohydrazide (4ae)                                                   | 30 |
| 3.15. IR spectra of 4-methyl-N',N'-diphenylbenzenesulfonylhydrazide (4be)                                         | 30 |
| 3.16. IR spectra of 1-methanesulfonyl-2-phenylhydrazine (4ce)                                                     | 31 |
| 3.17. IR spectra of N'-(3-chlorophenyl)benzenesulfonohydrazide (4af)                                              | 31 |
| 3.18. IR spectra of N'-(3-chlorophenyl)methanesulfonohydrazide (4cf)                                              | 31 |
| 3.19. IR spectra of 4-methyl-N'-(m-tolyl)benzenesulfonohydrazide (4bg)                                            | 32 |
| 3.20. IR spectra of 4-(pyridin-2-ylsulfonyl)morpholine (6ea)                                                      | 32 |
| 4. Computational details                                                                                          | 33 |
| 4.1. Energies and Cartesian Coordinates                                                                           | 33 |
| 5. Cytotoxicity of Compounds                                                                                      | 36 |
| 6. Availability of Data                                                                                           | 38 |

## 1. Complementary experiments

### 1.1. Control experiments

A round-bottom flask charged with chlorobenziodoxolone (**1**) (154.1 mg, 0.55 mmol) and TBAI (40.8 mg, 0.11 mmol). To the solids, 1,5 mL of solvent was added, and the reaction was stirred at -40 °C for 30 min. The hydrazine, N,N-methylphenyl hydrazine (**3b**) (35 µL, 0.36 mmol) was then added, and the reaction stirred at -40 °C for 1 h. When completed, the reaction was allowed to warm up to room temperature, washed with a saturated sodium hydrogencarbonate solution, and the resulting aqueous phase was extracted with ethyl acetate. The organic phase was dried with sodium sulfate, filtrated, and concentrated under vacuum. The crude was purified using flash chromatography with ethyl acetate/hexane.

A round-bottom flask charged with chlorobenziodoxolone (**1**) (154.1 mg, 0.55 mmol), sodium phenylsulfinate (**2a**) (85.7 mg, 0.55 mmol), TBAI (40.8 mg, 0.11 mmol) and TEMPO (94.5 mg, 0.55

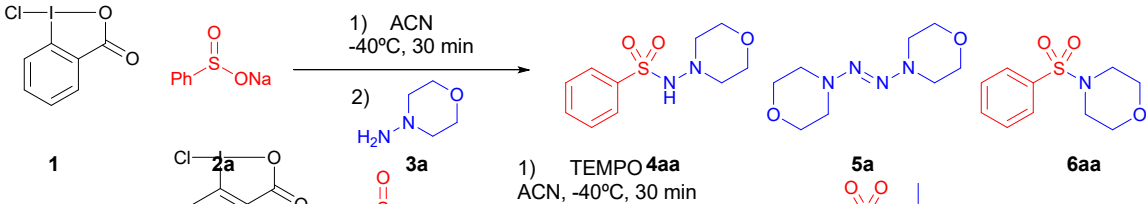

| Entry <sup>[a]</sup> | <b>1</b><br>(equiv.) | <b>2a</b><br>(equiv.) | <b>3a</b><br>(equiv.) | Additive<br>(equiv.) | Yield ( <b>4aa</b> )<br>(%) <sup>[a]</sup> | Yield ( <b>5a</b> )<br>(%) <sup>[a]</sup> | Yield ( <b>6aa</b> )<br>(%) <sup>[a]</sup> |
|----------------------|----------------------|-----------------------|-----------------------|----------------------|--------------------------------------------|-------------------------------------------|--------------------------------------------|
| 1                    | 1                    | 0                     | 3a 1                  | TBAI (0.2)           | NO                                         | 33                                        | NO                                         |
| 2                    | 1                    | 2a                    | 3a 1                  | 0                    | NO                                         | NO                                        | NO                                         |
| 3                    | 0                    | 0                     | 3a 1                  | TBAI (0.2)           | NO                                         | 48%                                       | NO                                         |

[a] Isolated yields; NO – Not Observed.

mmol). To the solids, 1,5 mL of solvent was added, and the reaction was stirred at -40 °C for 30 min. The hydrazine, N,N-methylphenyl hydrazine (**3b**) (35 µL, 0.36 mmol) was then added, and the reaction stirred at -40 °C for 1 h. When completed, the reaction was allowed to warm up to room temperature, washed with a saturated sodium hydrogencarbonate solution, and the resulting aqueous phase was extracted with ethyl acetate. The organic phase was dried with sodium sulfate, filtrated, and concentrated under vacuum. The crude was purified using flash

chromatography with ethyl acetate/hexane. The sulfonyl hydrazine N-morpholino-benzenesulfonamide (**4aa**) was isolated in 48% yield.

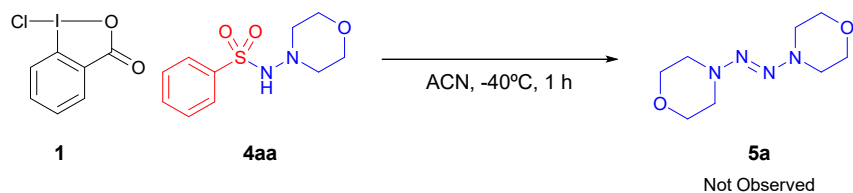

A round-bottom flask charged with chlorobenziodoxolone (**1**) (154.1 mg, 0.55 mmol) and N-morpholino-benzenesulfonamide (**4aa**) (128.7 mg, 0.55 mmol). The reagents were dissolved in 1,5 mL of solvent, and the reaction was stirred at - 40 °C for 1 h. When completed, the reaction was allowed to warm up to room temperature, washed with a saturated sodium hydrogencarbonate solution, and the resulting aqueous phase was extracted with ethyl acetate. The organic phase was dried with sodium sulfate, filtrated, and concentrated under vacuum. No compound **5** was obtained.

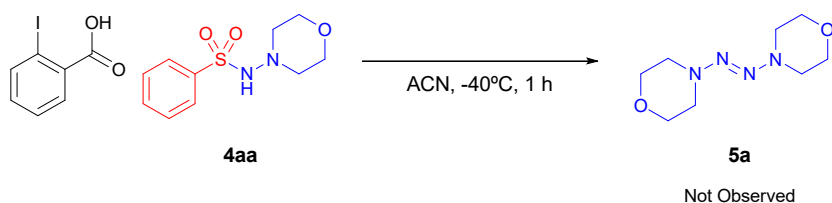

A round-bottom flask charged with 2-iodobenzoic acid (150.1 mg, 0.60 mmol) and N-morpholino-benzenesulfonamide (**4aa**) (146.5 mg, 0.60 mmol). The reagents were dissolved in 1 mL of solvent, and the reaction was stirred at - 40 °C for 1 h. When completed, the reaction was allowed to warm up to room temperature, washed with a saturated sodium hydrogencarbonate solution, and the resulting aqueous phase was extracted with ethyl acetate. The organic phase was dried with sodium sulfate, filtrated, and concentrated under vacuum. No compound **5** was obtained.

## 2. $^1\text{H}$ and $^{13}\text{C}$ spectra

### 2.1. $^1\text{H}$ NMR ( $\text{CDCl}_3$ , 400 MHz) of 1-chloro-1,2-benziodoxol-3-(1*H*)-one (1)

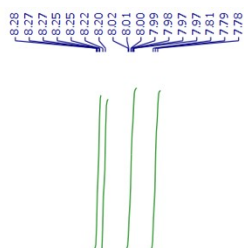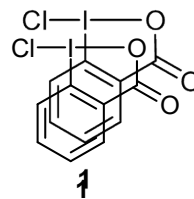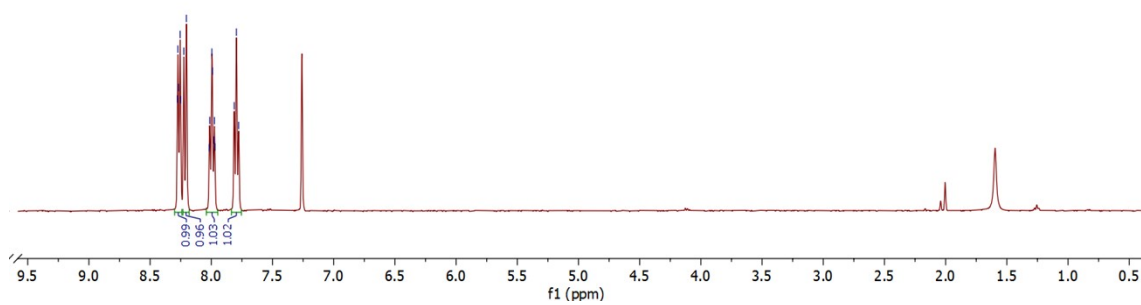

### 2.2. $^{13}\text{C}$ NMR ( $\text{CDCl}_3$ , 400 MHz) of 1-chloro-1,2-benziodoxol-3-(1*H*)-one (1)

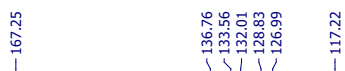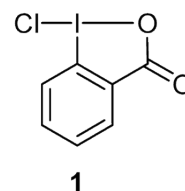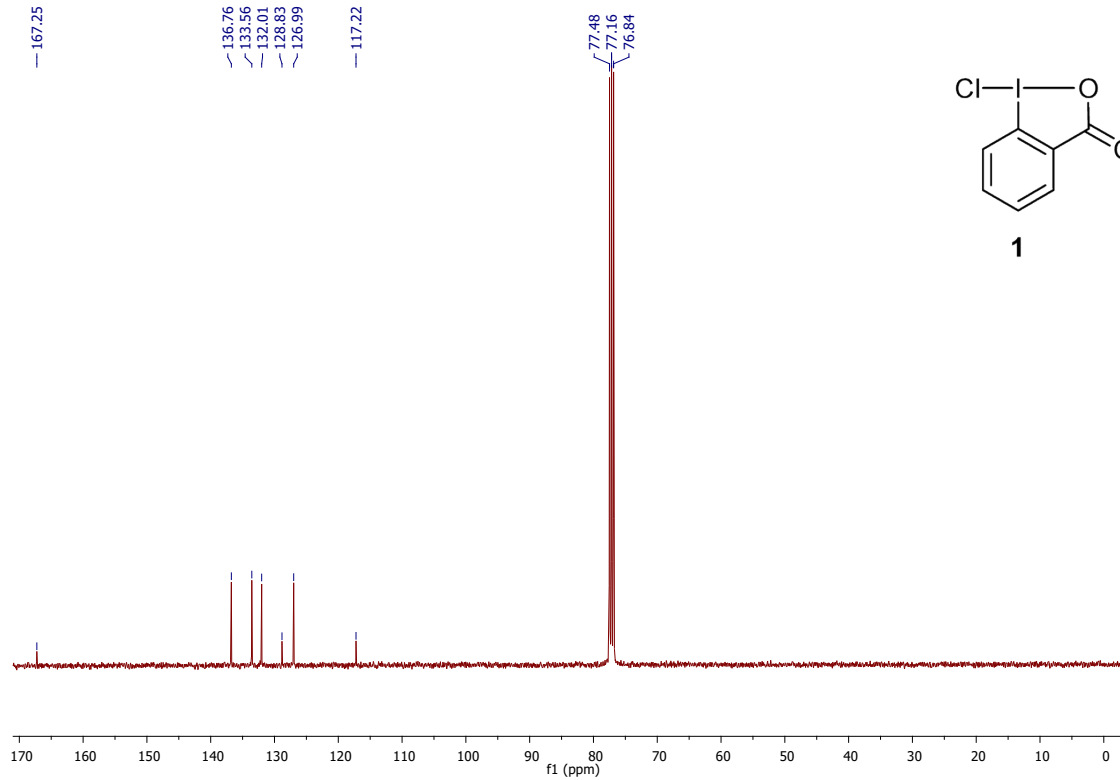

2.3.  $^1\text{H}$  NMR ( $\text{CDCl}_3$ , 400 MHz) of 1,2-dimorpholinodiazenes (5)

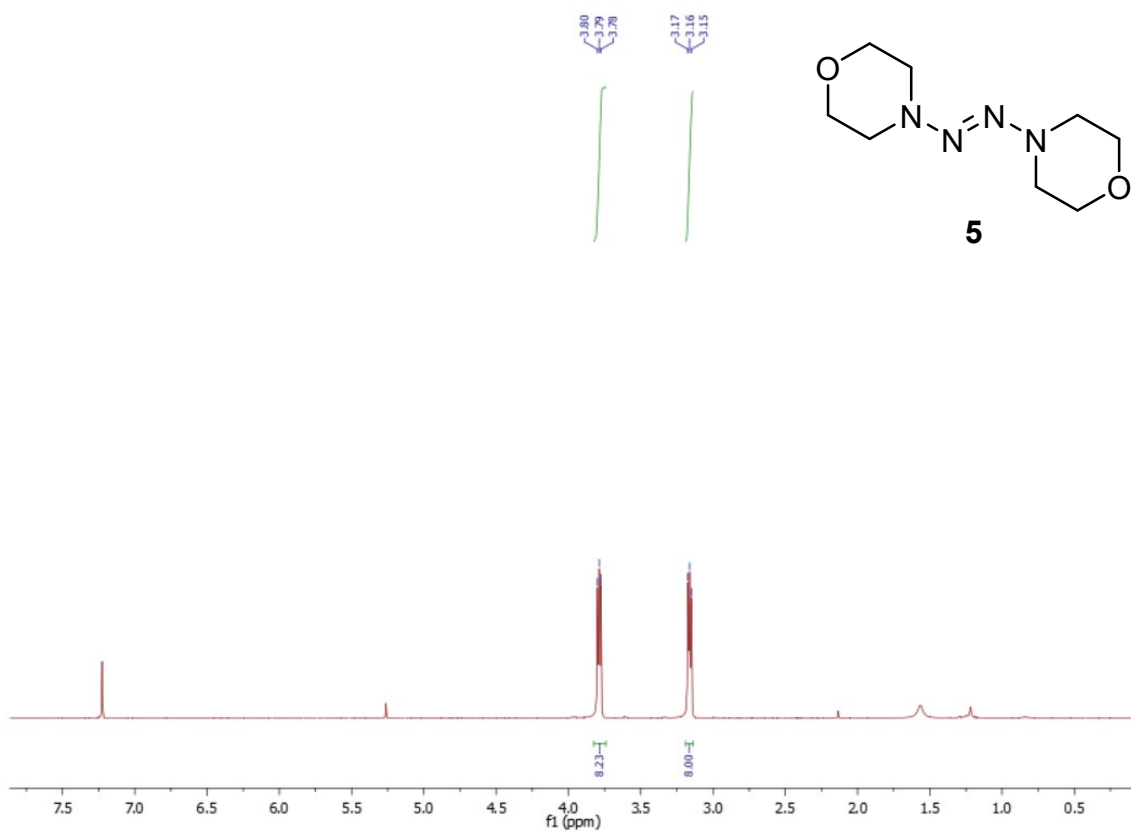

2.4.  $^{13}\text{C}$  NMR ( $\text{CDCl}_3$ , 400 MHz) of 1,2-dimorpholinodiazenes (5)

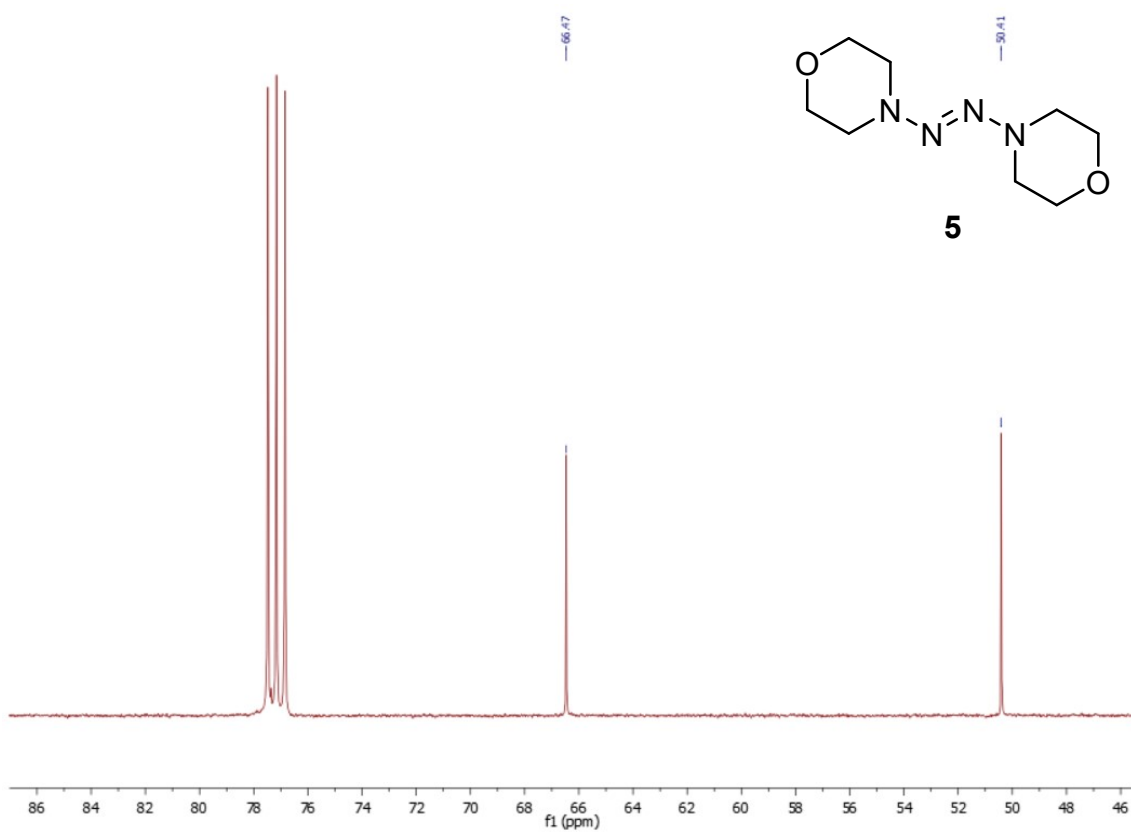

## 2.5. $^1\text{H}$ NMR ( $\text{CDCl}_3$ , 400 MHz) of N-morpholinobenzenesulfonamide (4aa)

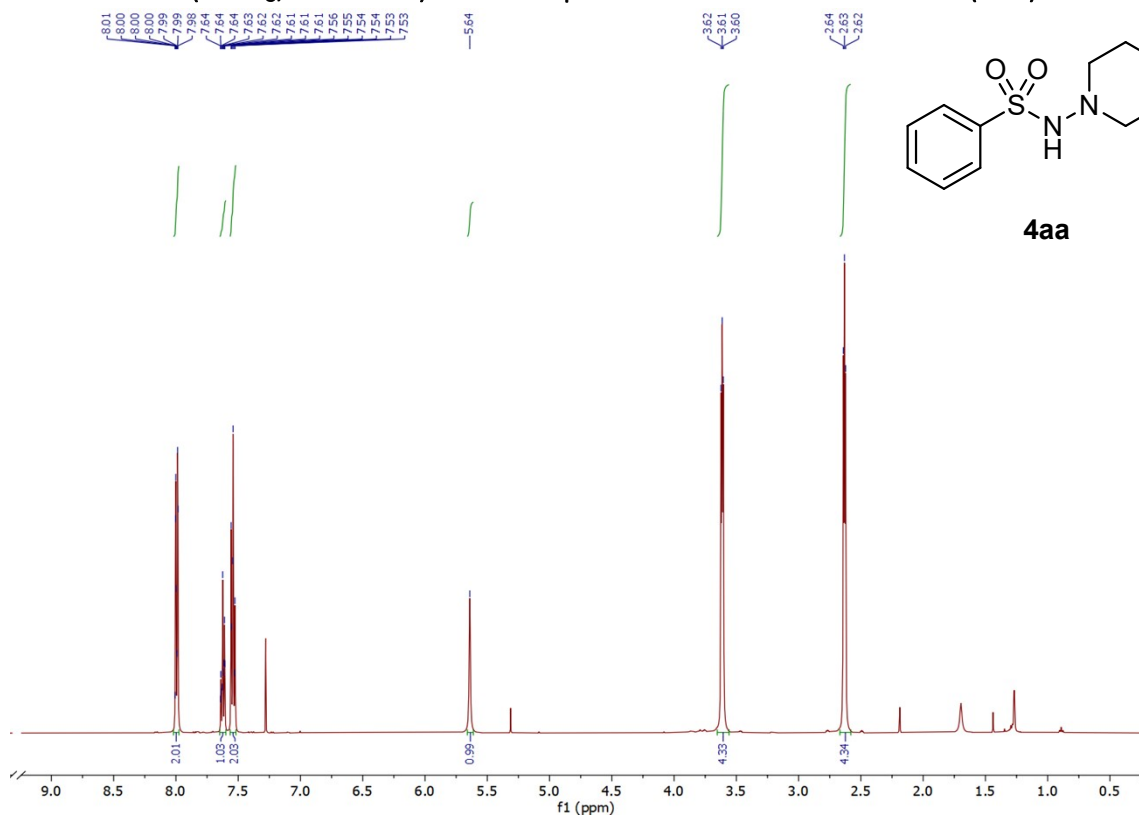

## 2.6. $^{13}\text{C}$ NMR ( $\text{CDCl}_3$ , 400 MHz) of N-morpholinobenzenesulfonamide (4aa)

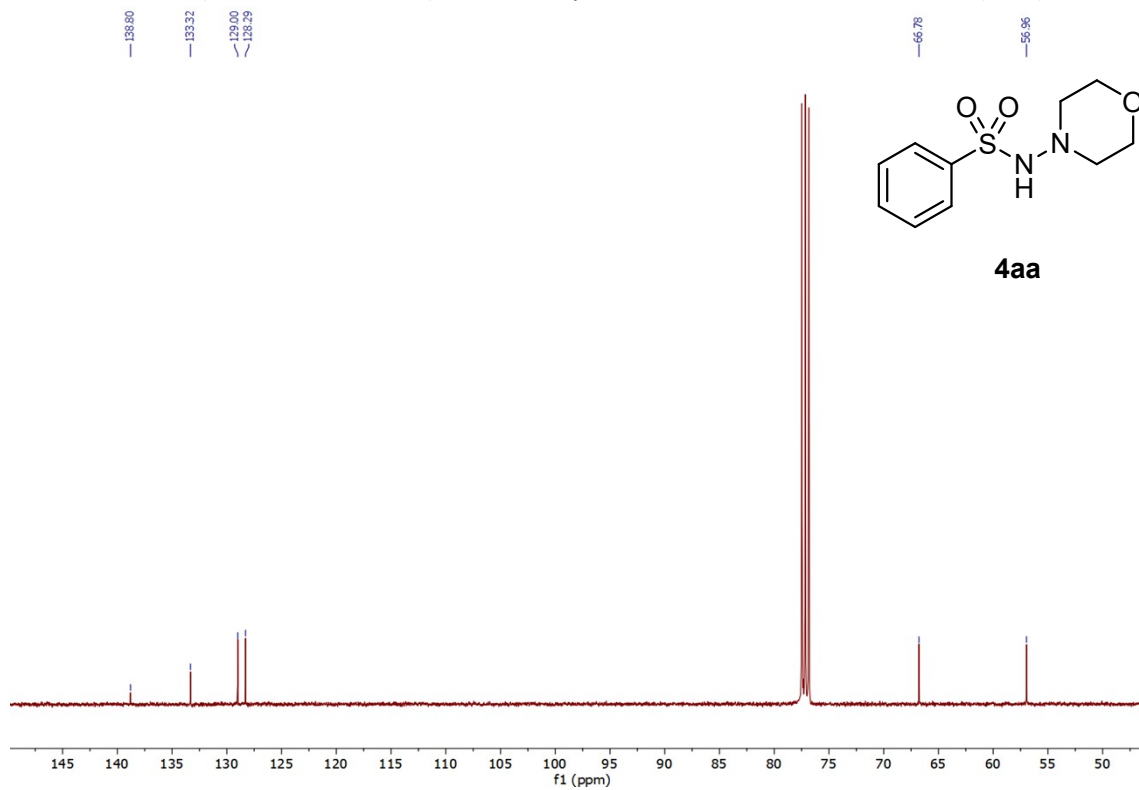



2.7.  $^1\text{H}$  NMR ( $\text{CDCl}_3$ , 400 MHz) of N'-methyl-N'-phenylbenzenesulfonylhydrazide (4ab)

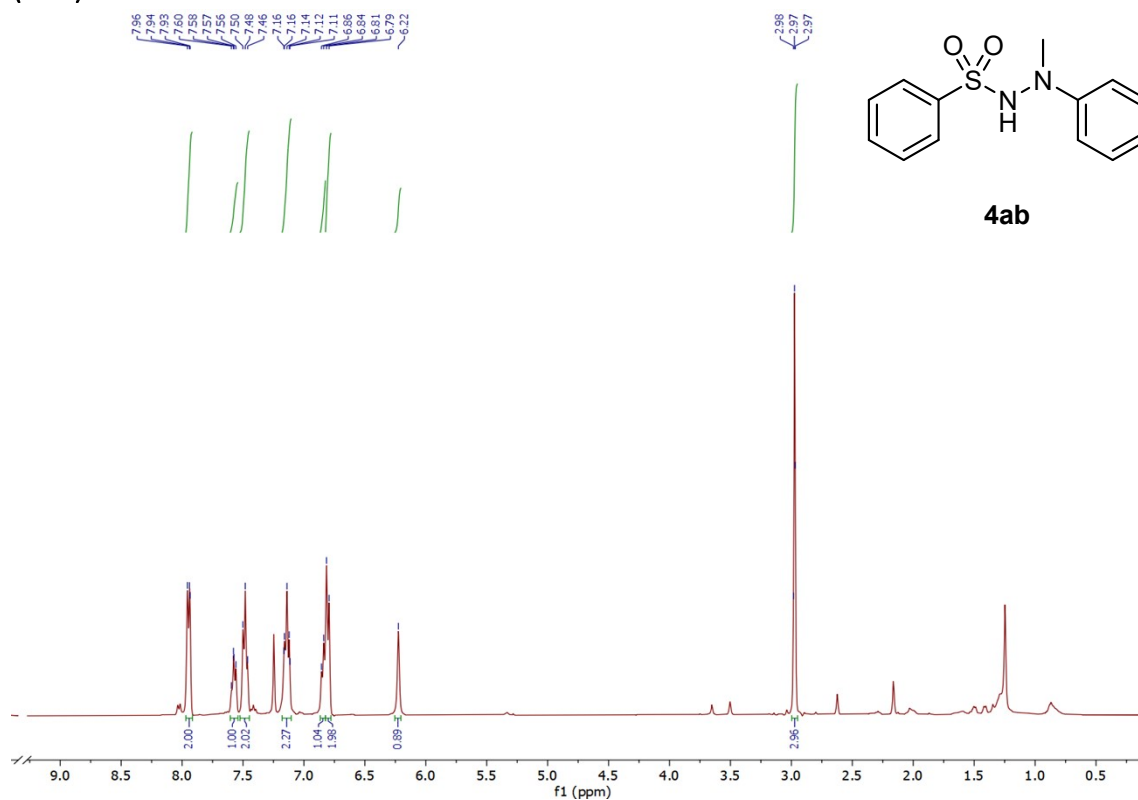

2.8.  $^{13}\text{C}$  NMR ( $\text{CDCl}_3$ , 400 MHz) of N'-methyl-N'-phenylbenzenesulfonylhydrazide (4ab)

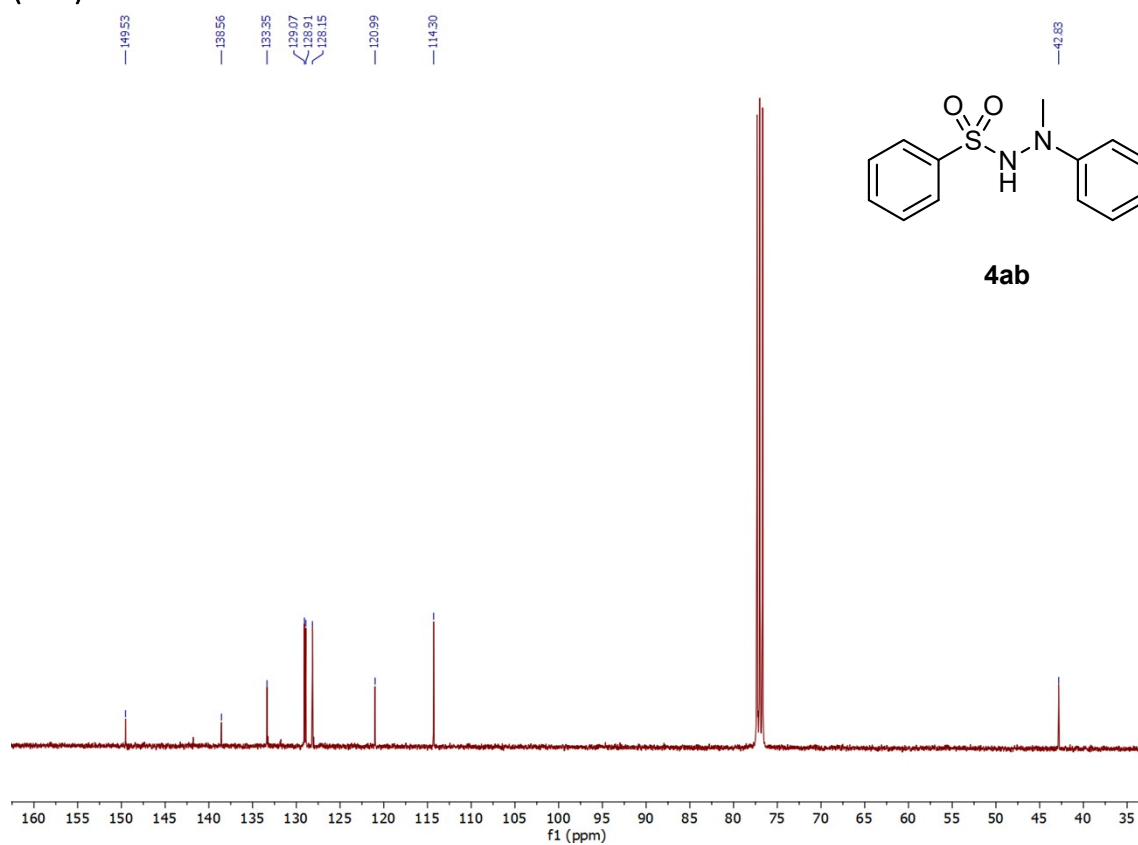

2.9.  $^1\text{H}$  NMR ( $\text{CDCl}_3$ , 400 MHz) of 4-methyl-N-morpholinobenzenesulfonamide (4ba)

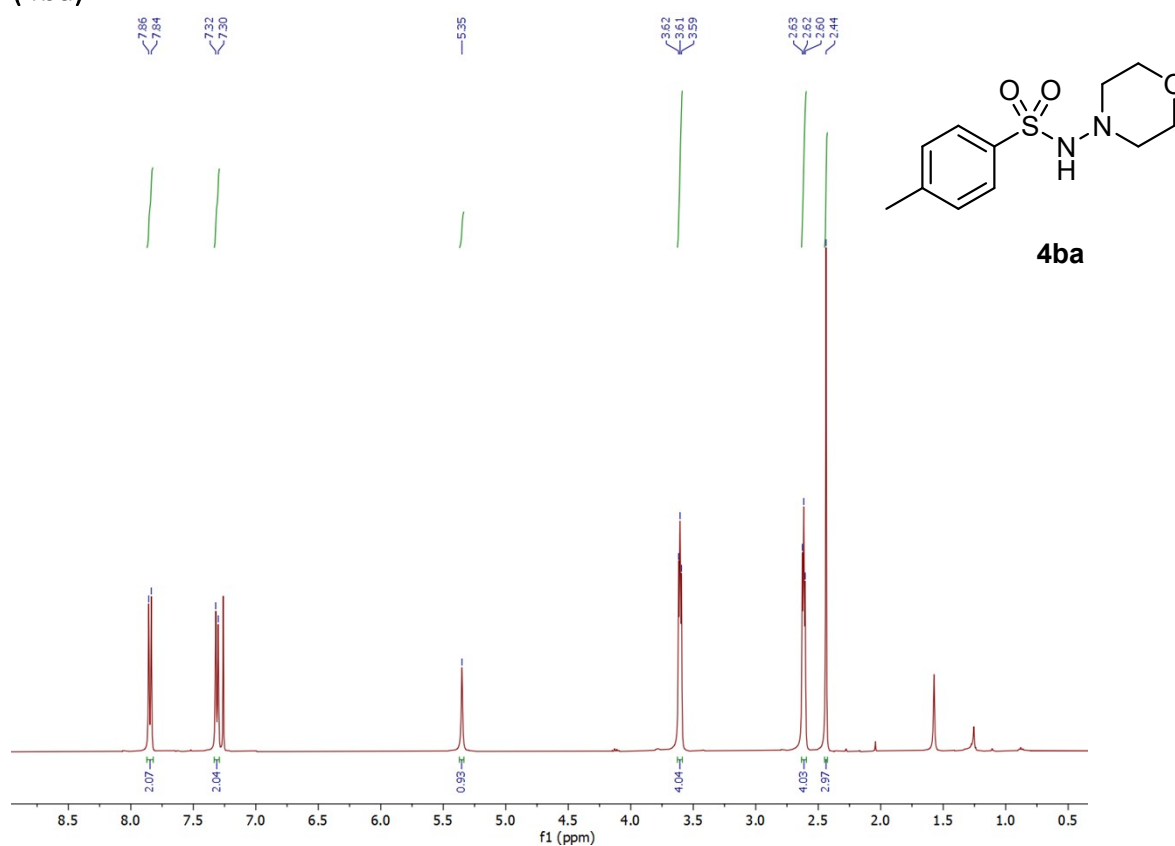

2.10.  $^{13}\text{C}$  NMR ( $\text{CDCl}_3$ , 400 MHz) of 4-methyl-N-morpholinobenzenesulfonamide (4ba)

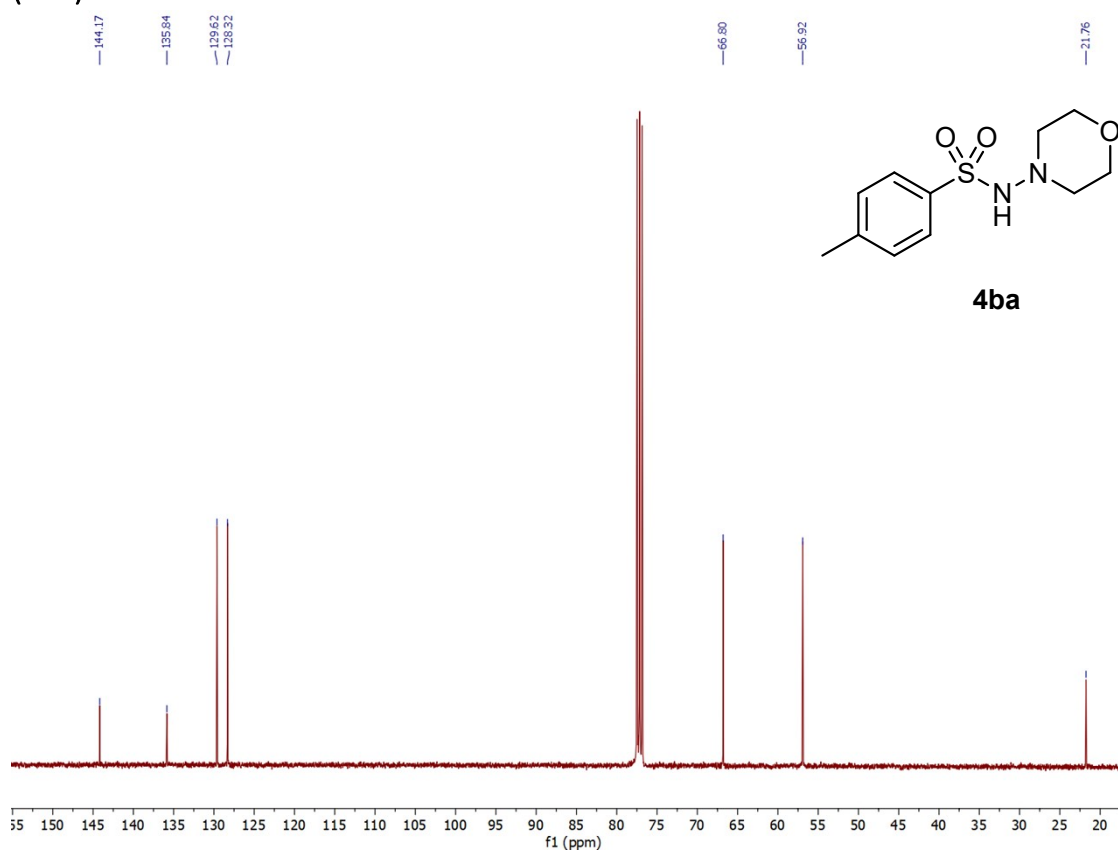

2.11.  $^1\text{H}$  NMR ( $\text{CDCl}_3$ , 400 MHz) of N-Methyl-N-phenyl-N'-p-toluolsulfonylhydrazin (4bb)

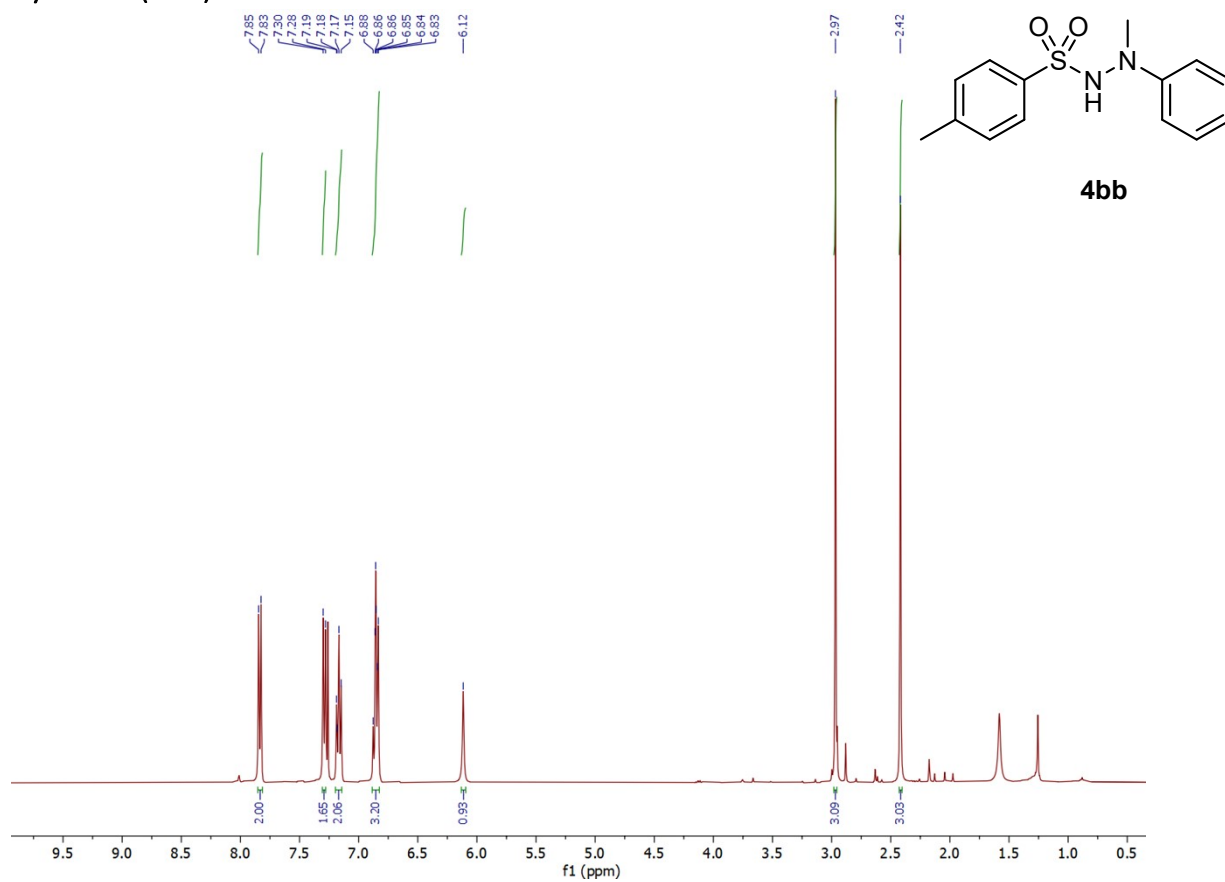

2.12.  $^{13}\text{C}$  NMR ( $\text{CDCl}_3$ , 400 MHz) of N-Methyl-N-phenyl-N'-p-toluolsulfonylhydrazin (4bb)

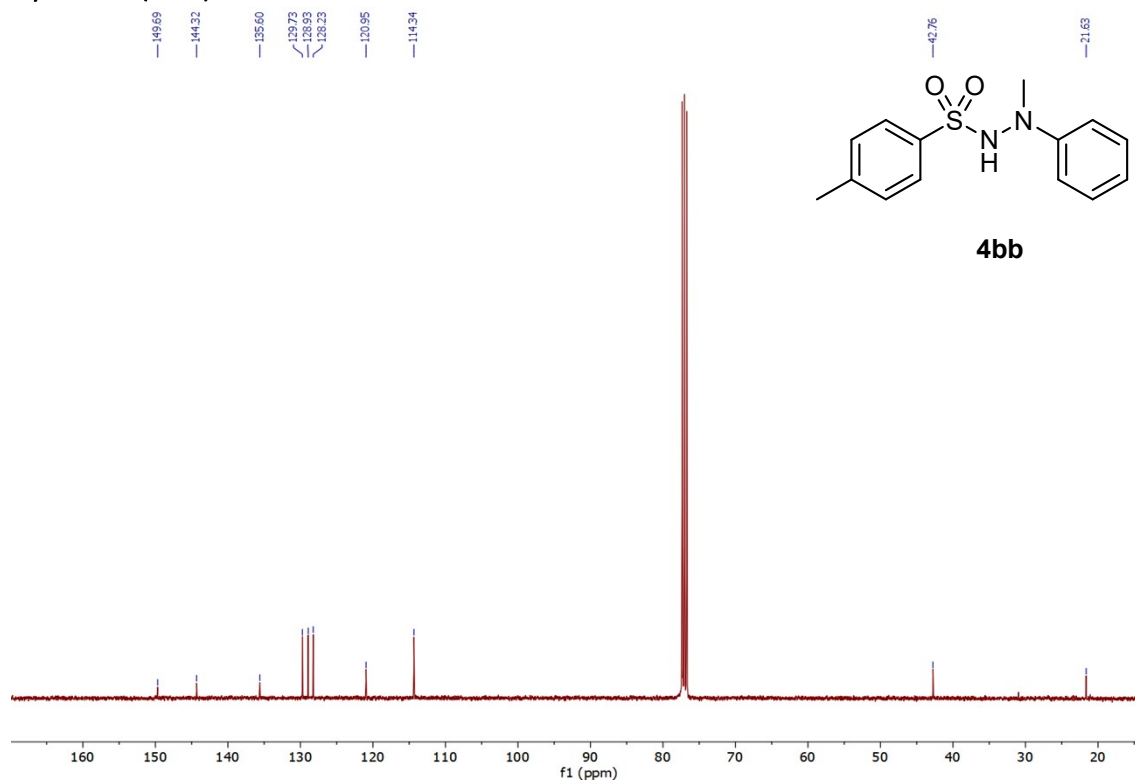

2.13.  $^1\text{H}$  NMR ( $\text{CDCl}_3$ , 400 MHz) of N'-methyl-N'-phenylmethanesulfonylhydrazide (4cb)

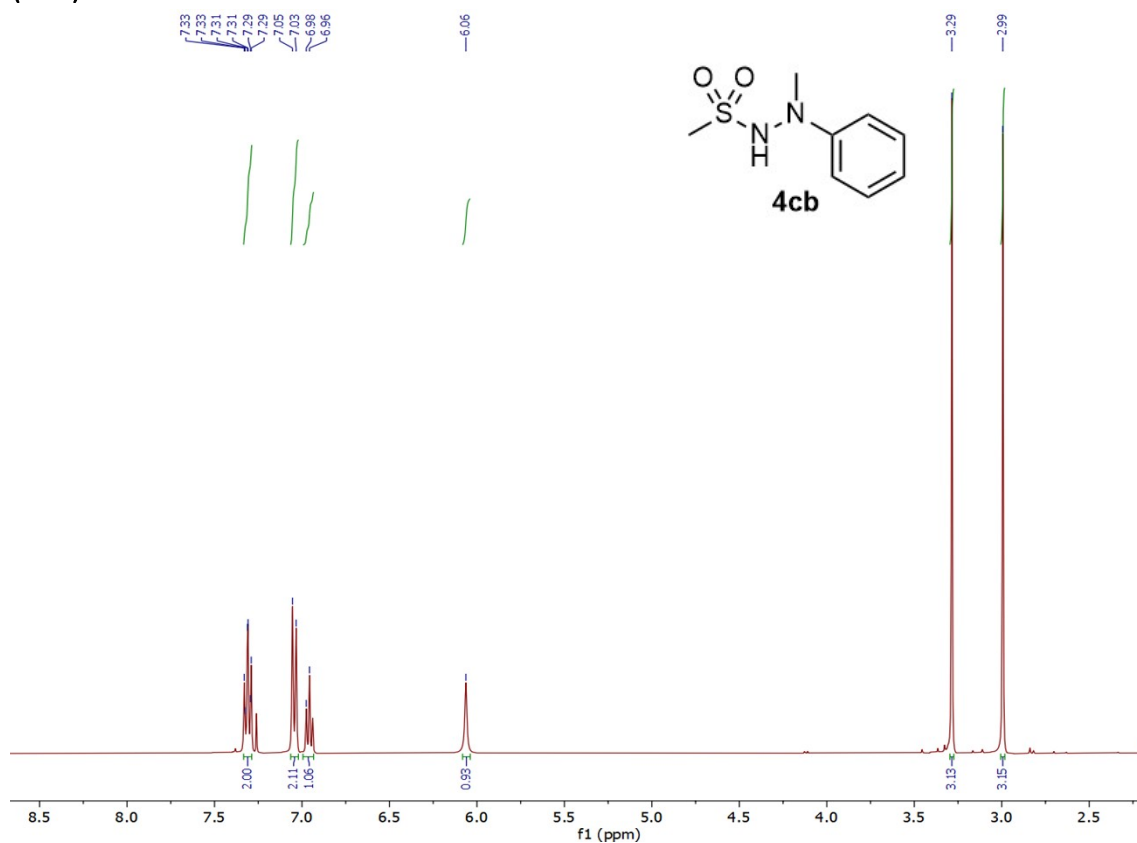

2.14.  $^{13}\text{C}$  NMR ( $\text{CDCl}_3$ , 400 MHz) of N'-methyl-N'-phenylmethanesulfonylhydrazide (4cb)

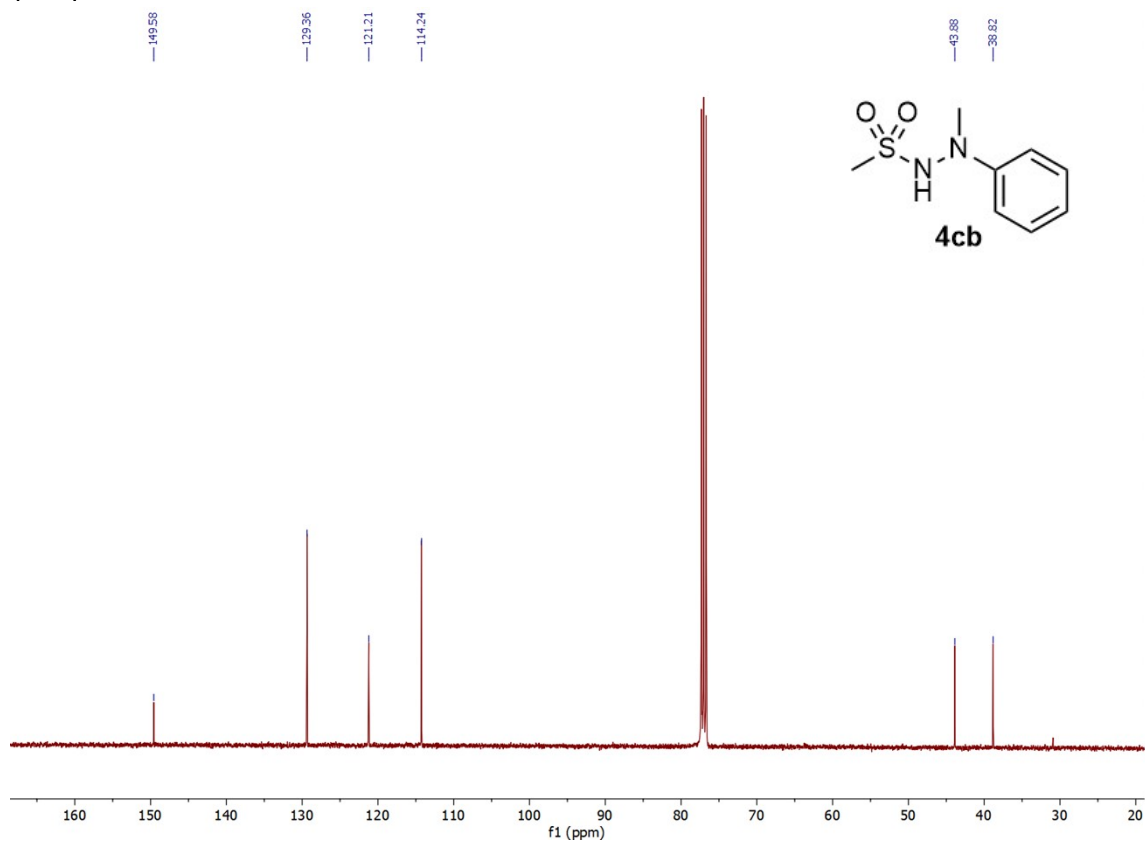

### 2.15. $^1\text{H}$ NMR ( $\text{CDCl}_3$ , 400 MHz) of N'-methyl-N'-phenylnaphthalene-2-sulfonohydrazide (4db)

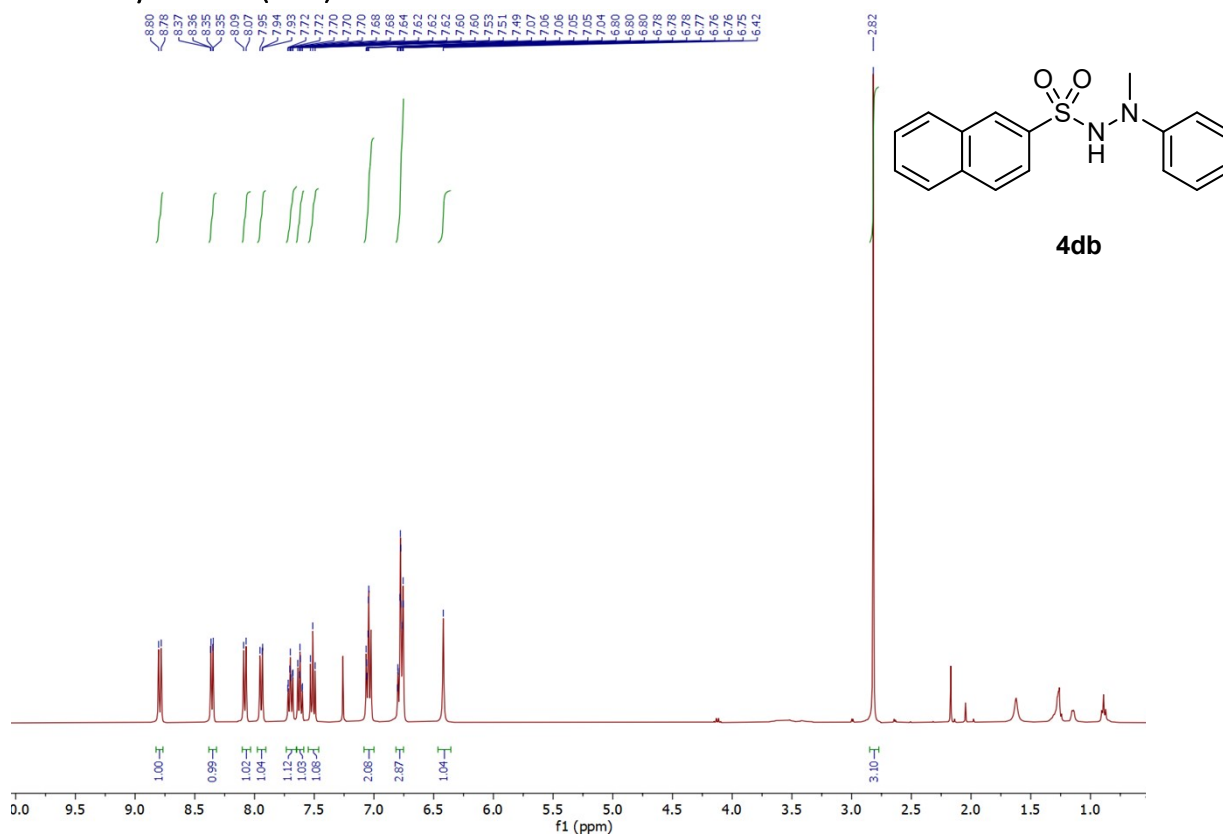

### 2.16. $^{13}\text{C}$ NMR ( $\text{CDCl}_3$ , 400 MHz) of N'-methyl-N'-phenylnaphthalene-2-sulfonohydrazide (4db)

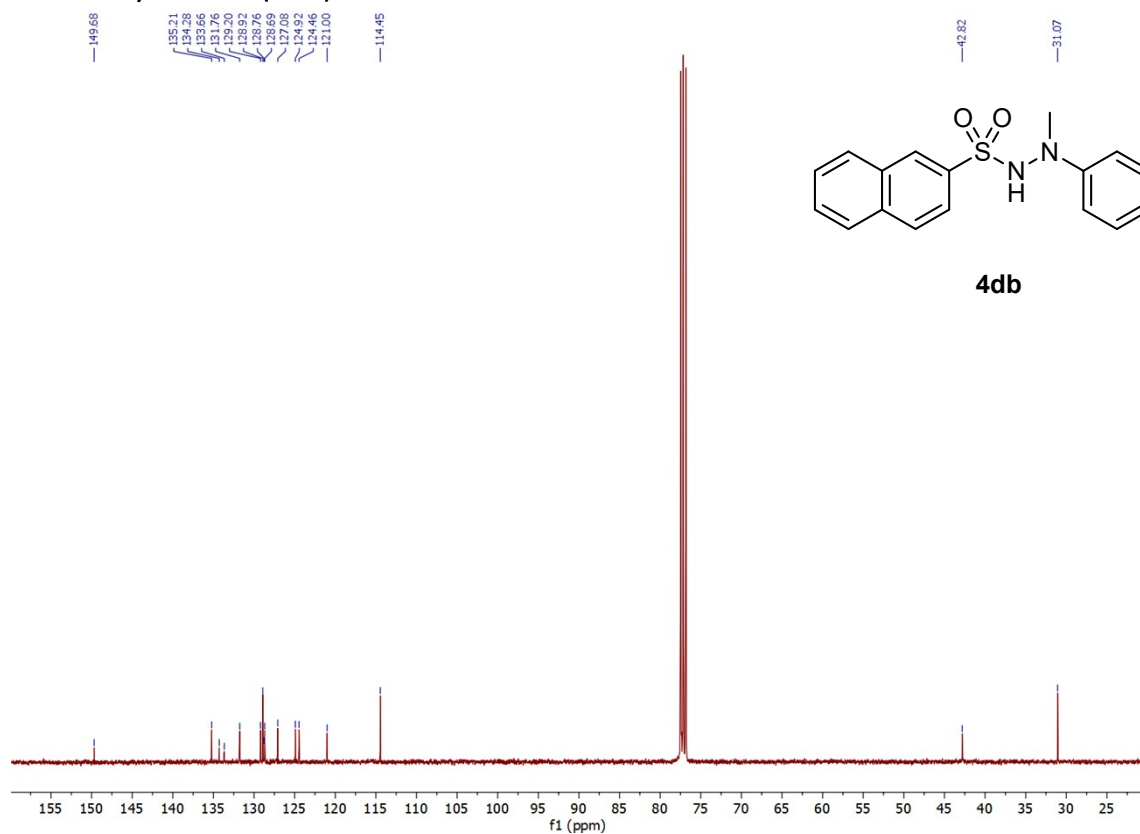

2.17.  $^1\text{H}$  NMR ( $\text{CDCl}_3$ , 400 MHz) of N'-methyl-N'-phenylpyridin-2-sulfonohydrazide (4eb)

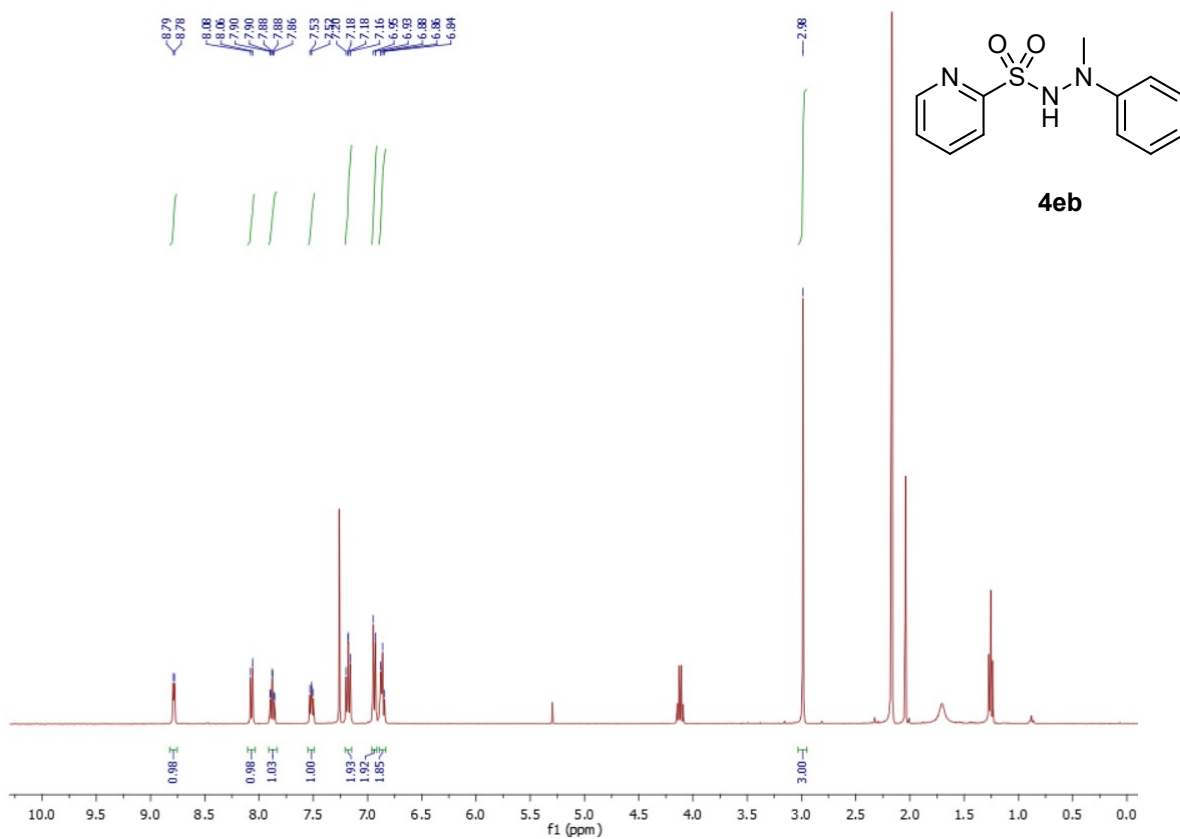

2.18.  $^{13}\text{C}$  NMR ( $\text{CDCl}_3$ , 400 MHz) of N'-methyl-N'-phenylpyridin-2-sulfonohydrazide (4eb)

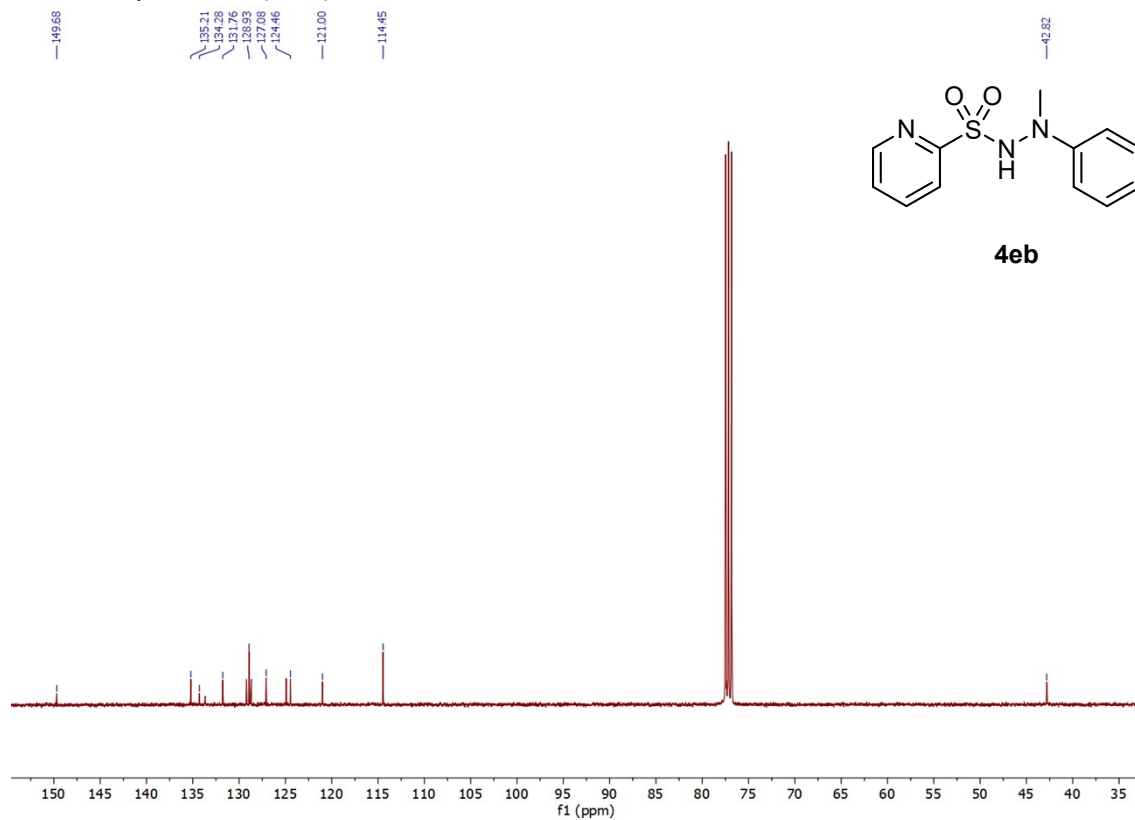

### 2.19. <sup>1</sup>H NMR (CDCl<sub>3</sub>, 400 MHz) of N-(piperidin-1-yl)benzenesulfonamide (4ac)

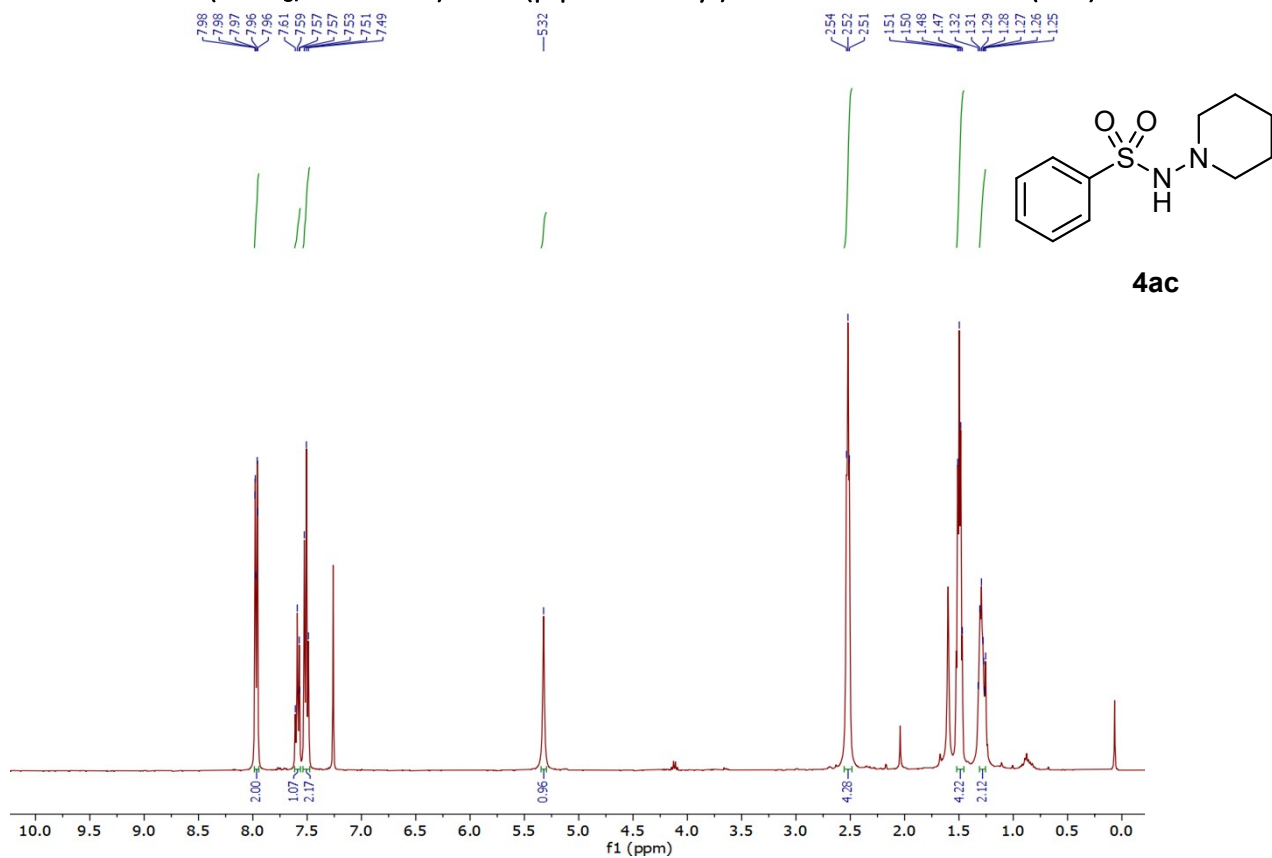

### 2.20. <sup>13</sup>C NMR (CDCl<sub>3</sub>, 400 MHz) of N-(piperidin-1-yl)benzenesulfonamide (4ac)

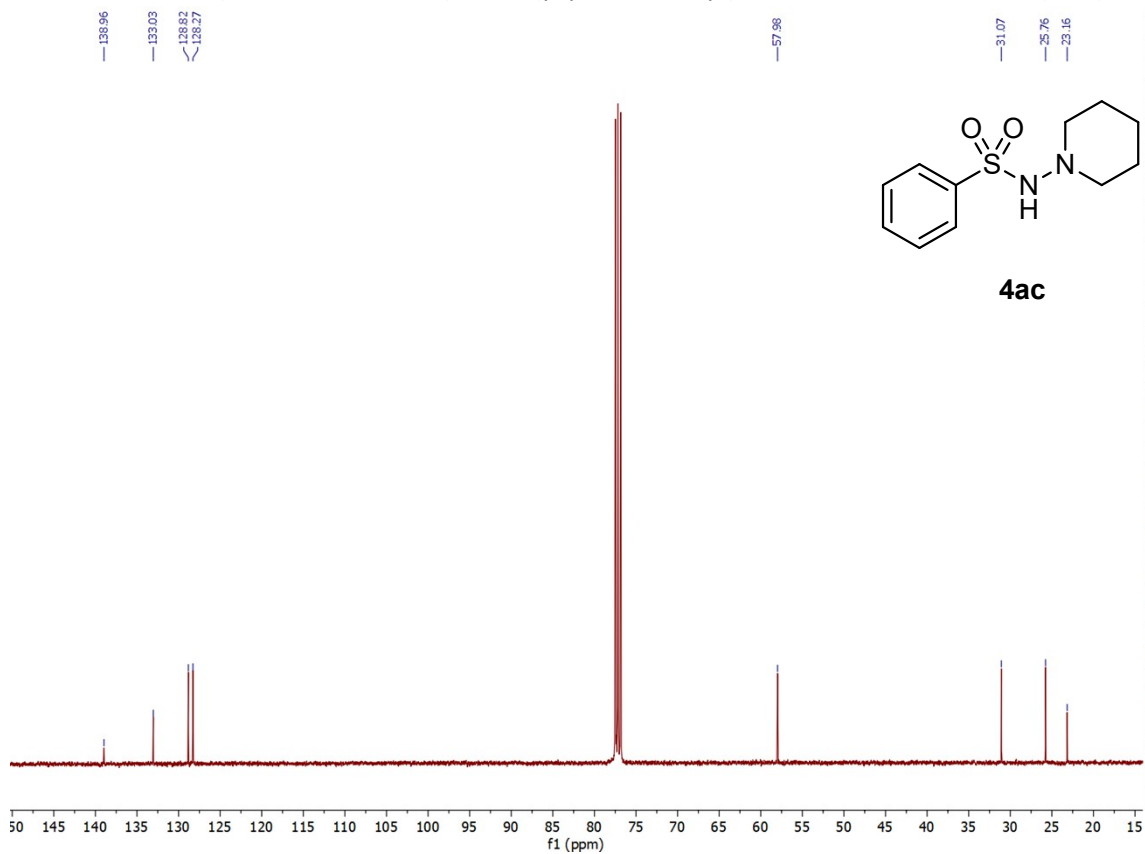

2.21. <sup>1</sup>H NMR (CDCl<sub>3</sub>, 400 MHz) of 4-methyl-N-(piperidin-1 yl) benzenesulfonamide (4bc)

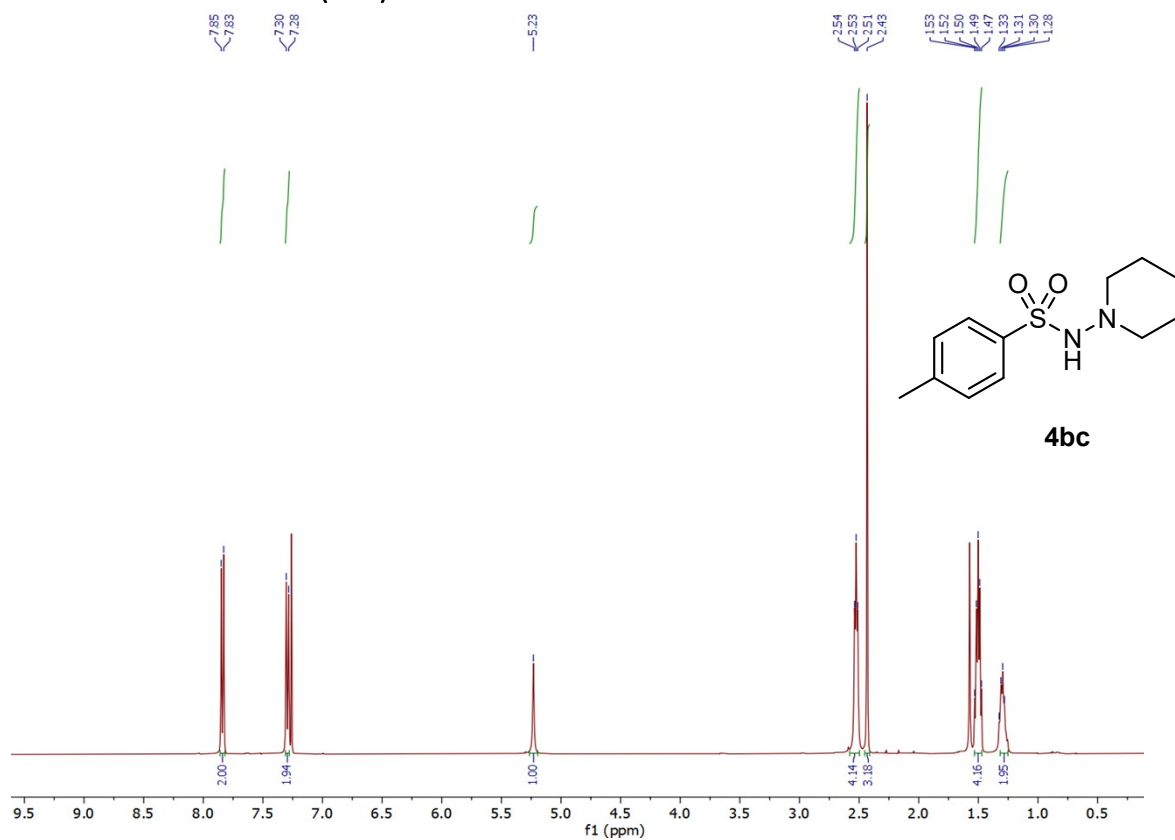



2.22.  $^{13}\text{C}$  NMR ( $\text{CDCl}_3$ , 400 MHz) of 4-methyl-N-(piperidin-1-yl) benzenesulfonamide (4bc)

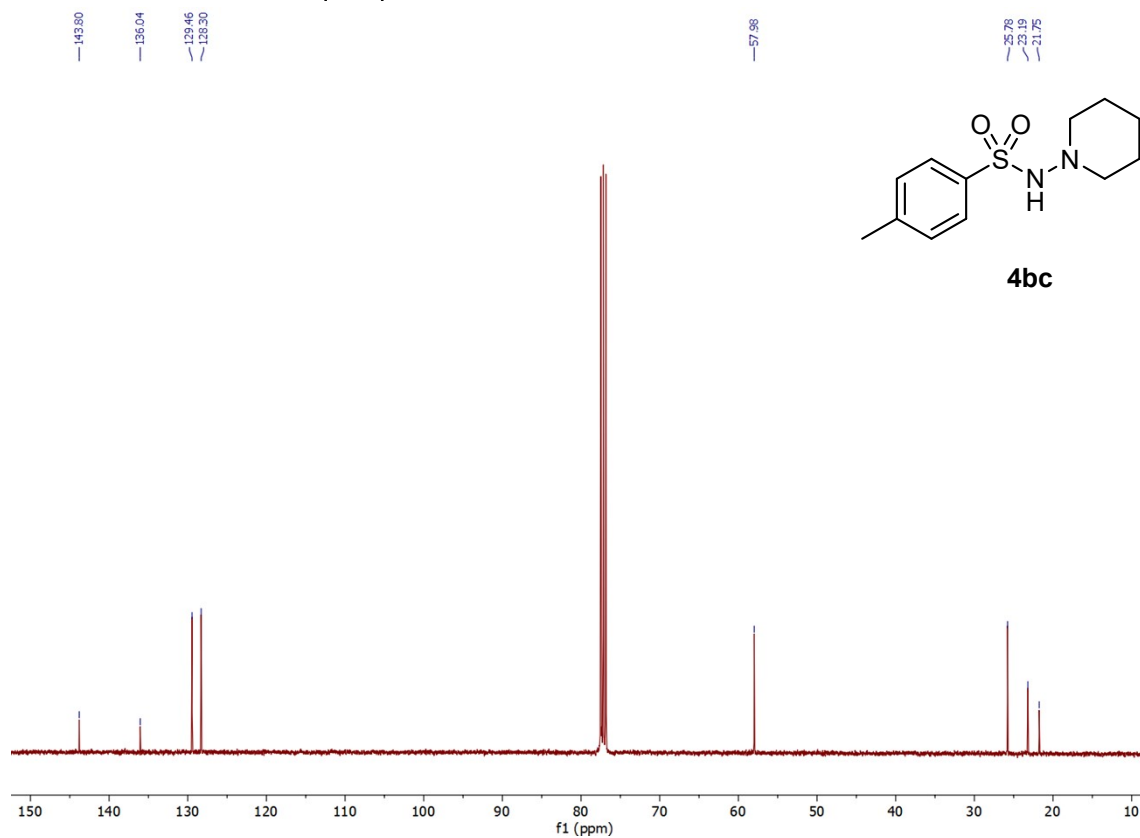

2.23.  $^1\text{H}$  NMR ( $\text{CDCl}_3$ , 400 MHz) of 2-Benzolsulfonyl-1,1-dimethyl-hydrazin (4ad)

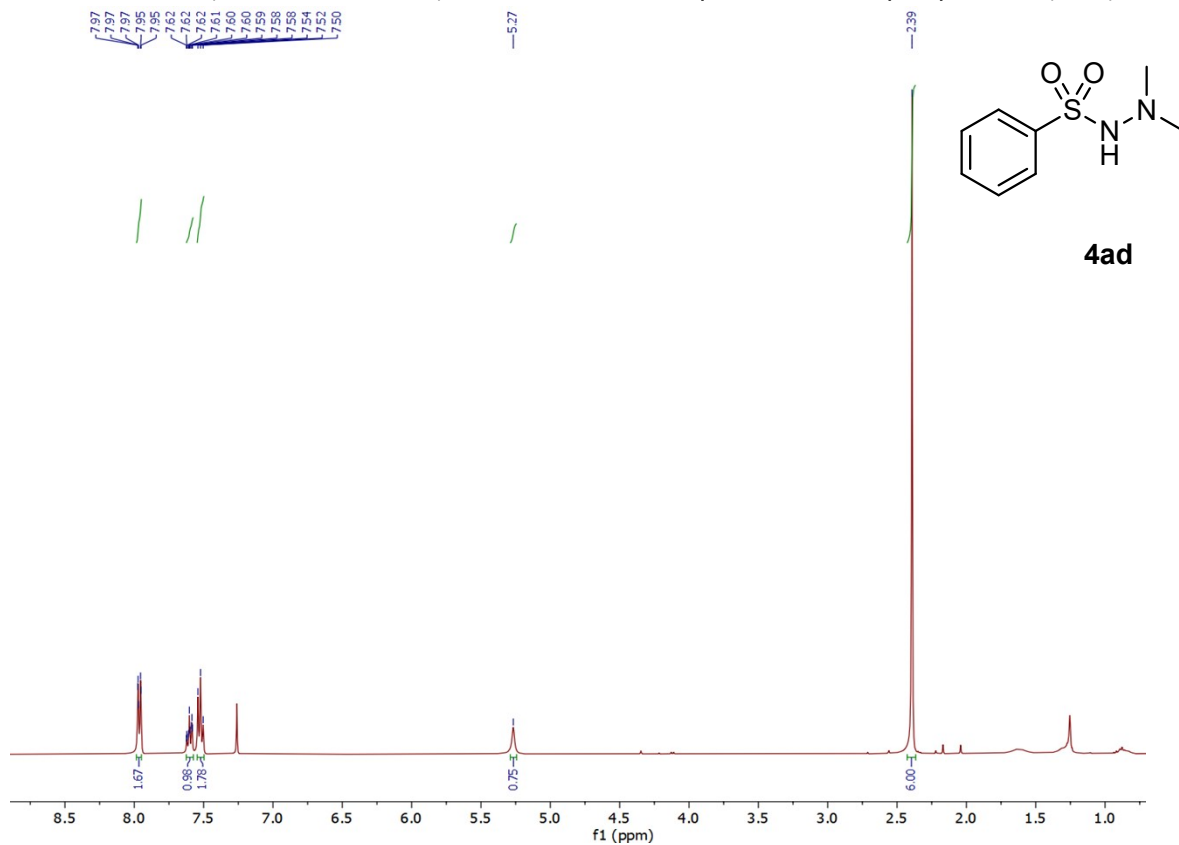

2.24.  $^{13}\text{C}$  NMR ( $\text{CDCl}_3$ , 400 MHz) of 2-Benzolsulfonyl-1,1-dimethyl-hydrazin (4ad)

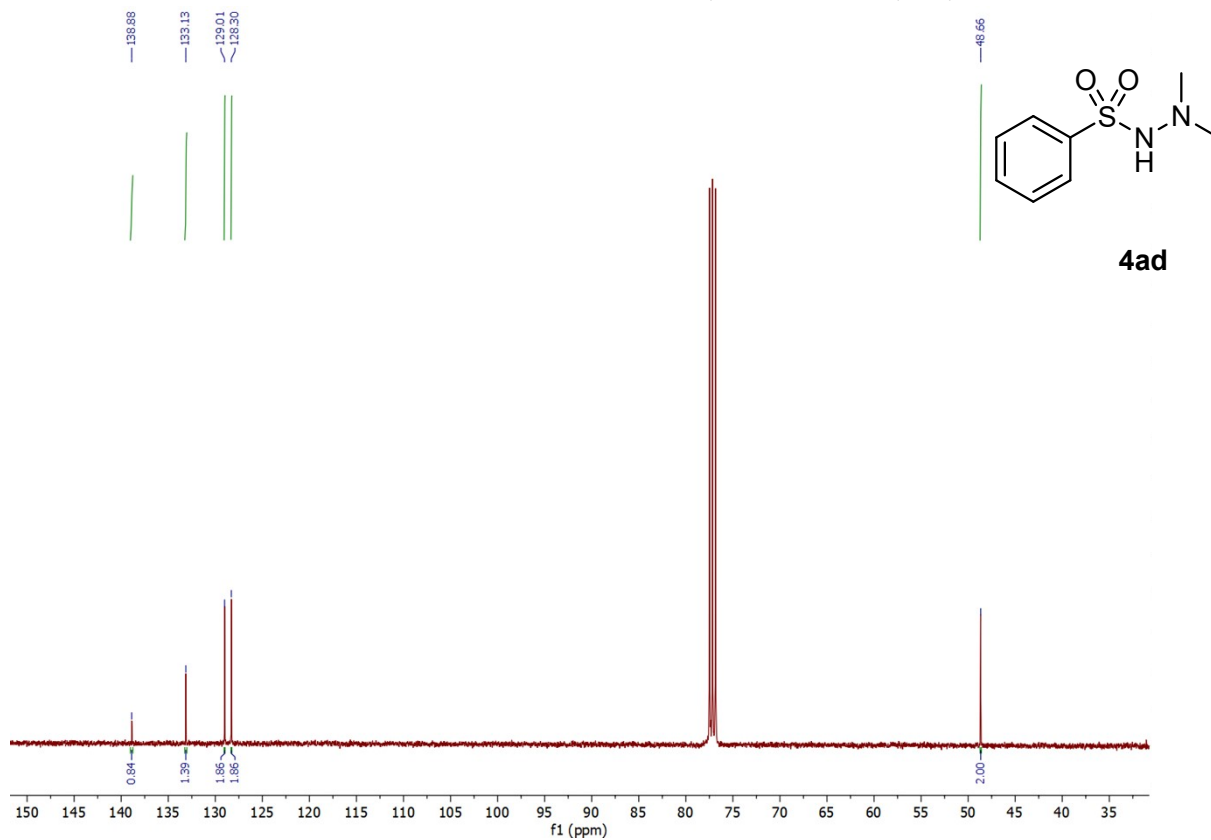

2.25.  $^1\text{H}$  NMR ( $\text{CDCl}_3$ , 400 MHz) of N,N-Dimethyl-4-toluenesulfonylhydrazide (4bd)

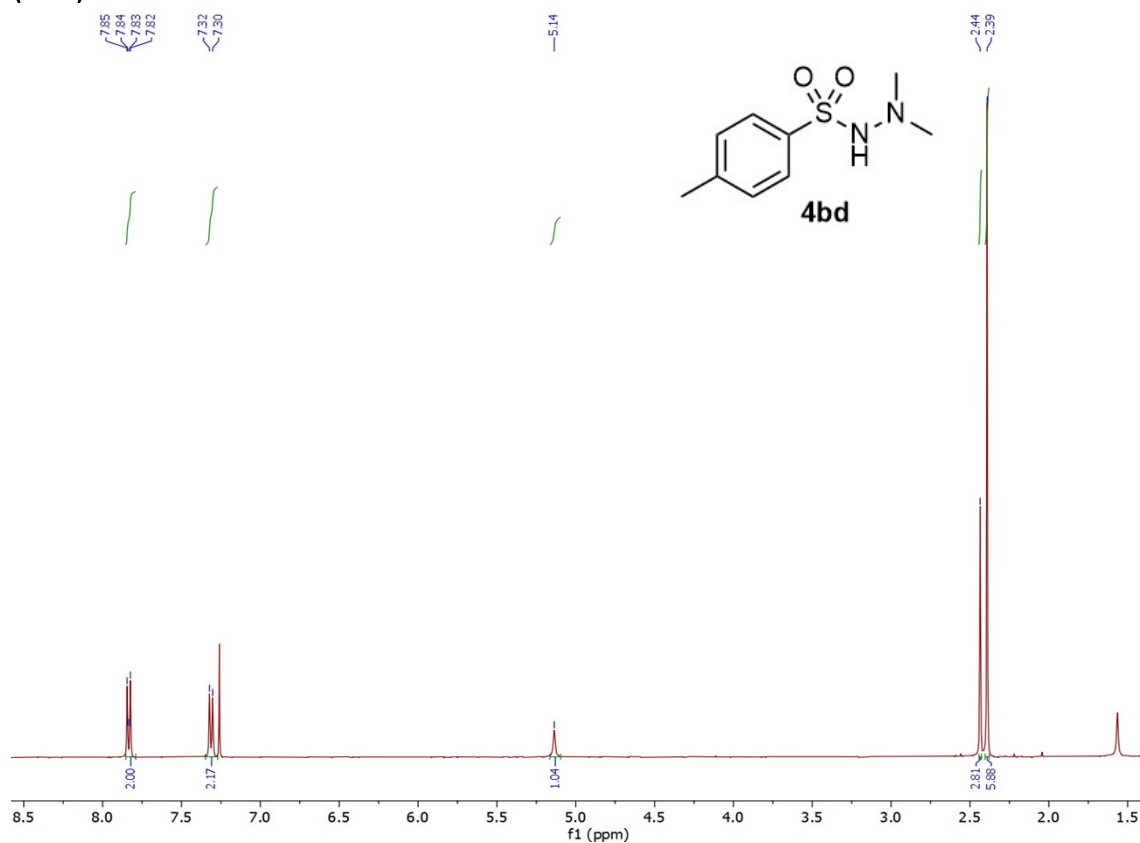

2.26.  $^{13}\text{C}$  NMR ( $\text{CDCl}_3$ , 400 MHz) of N,N-Dimethyl-4-toluenesulfonylhydrazide (4bd)

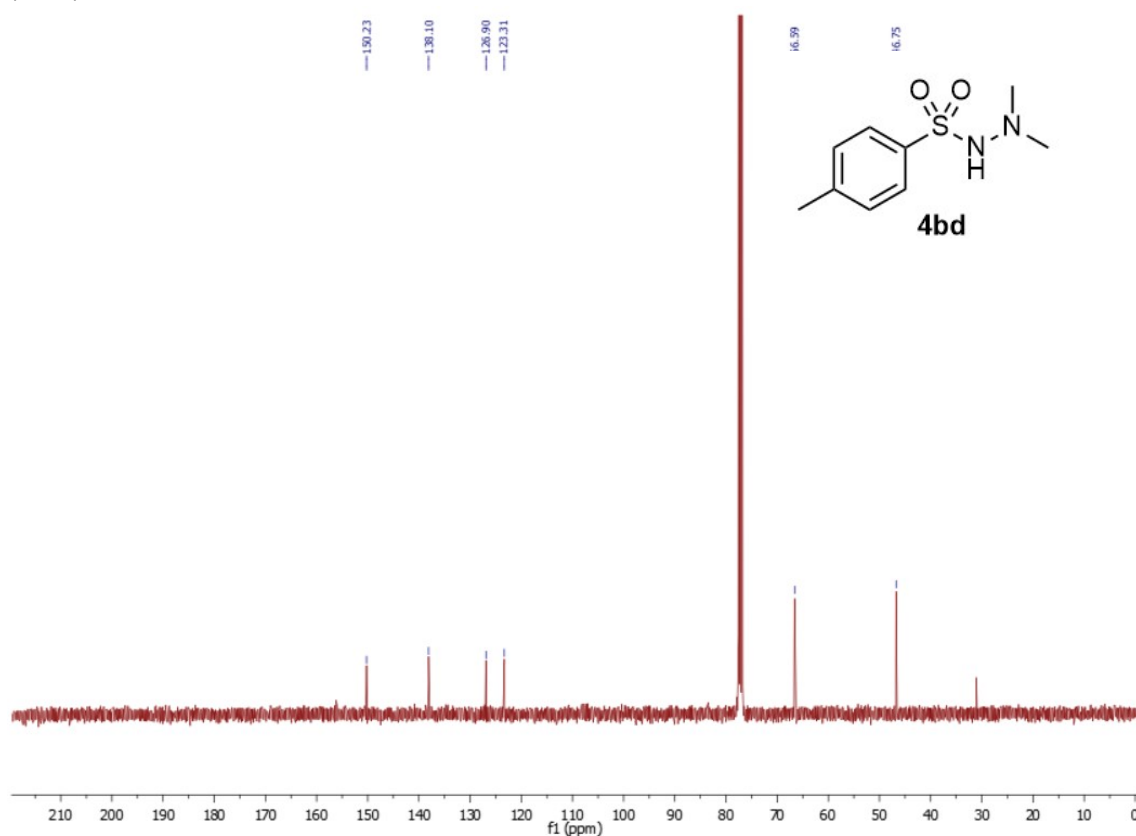

2.27.  $^1\text{H}$  NMR ( $\text{CDCl}_3$ , 400 MHz) of N',N'-diphenylbenzenesulfonylhydrazide (4ae)

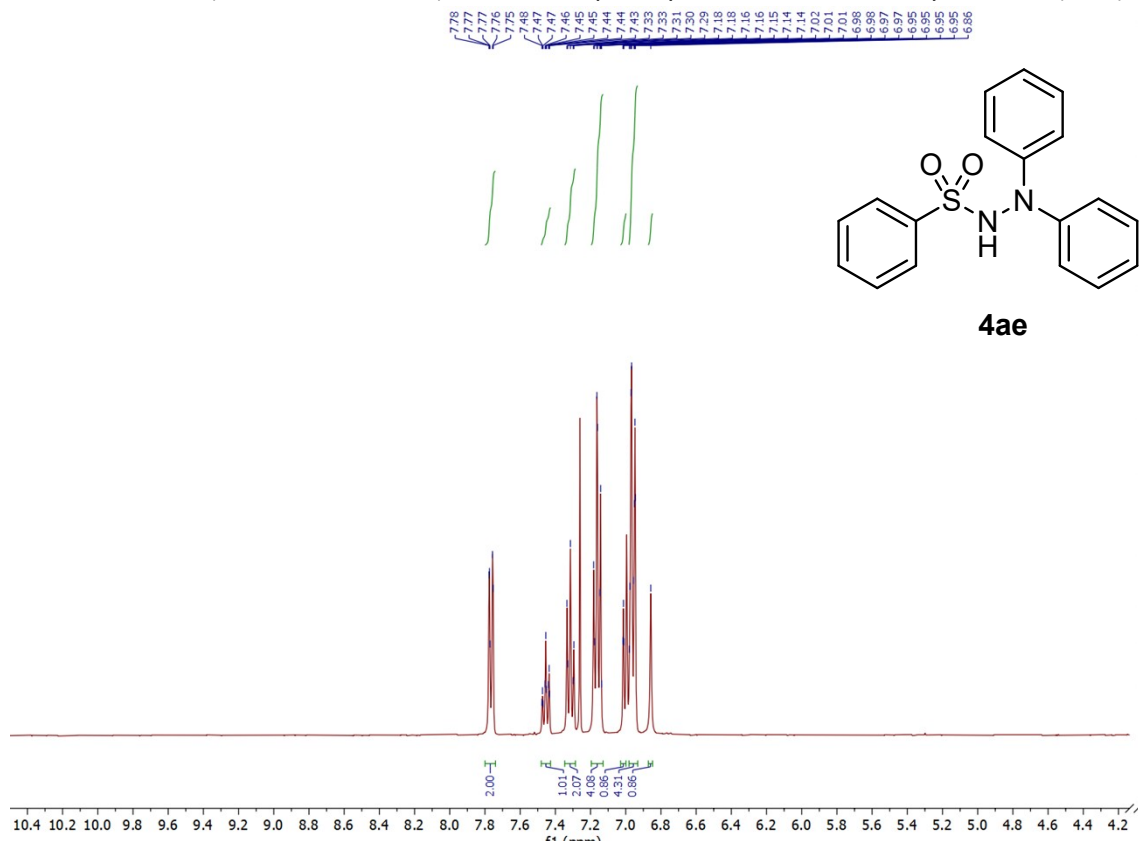

2.28.  $^{13}\text{C}$  NMR ( $\text{CDCl}_3$ , 400 MHz) of N',N'-diphenylbenzenesulfonylhydrazide (4ae)

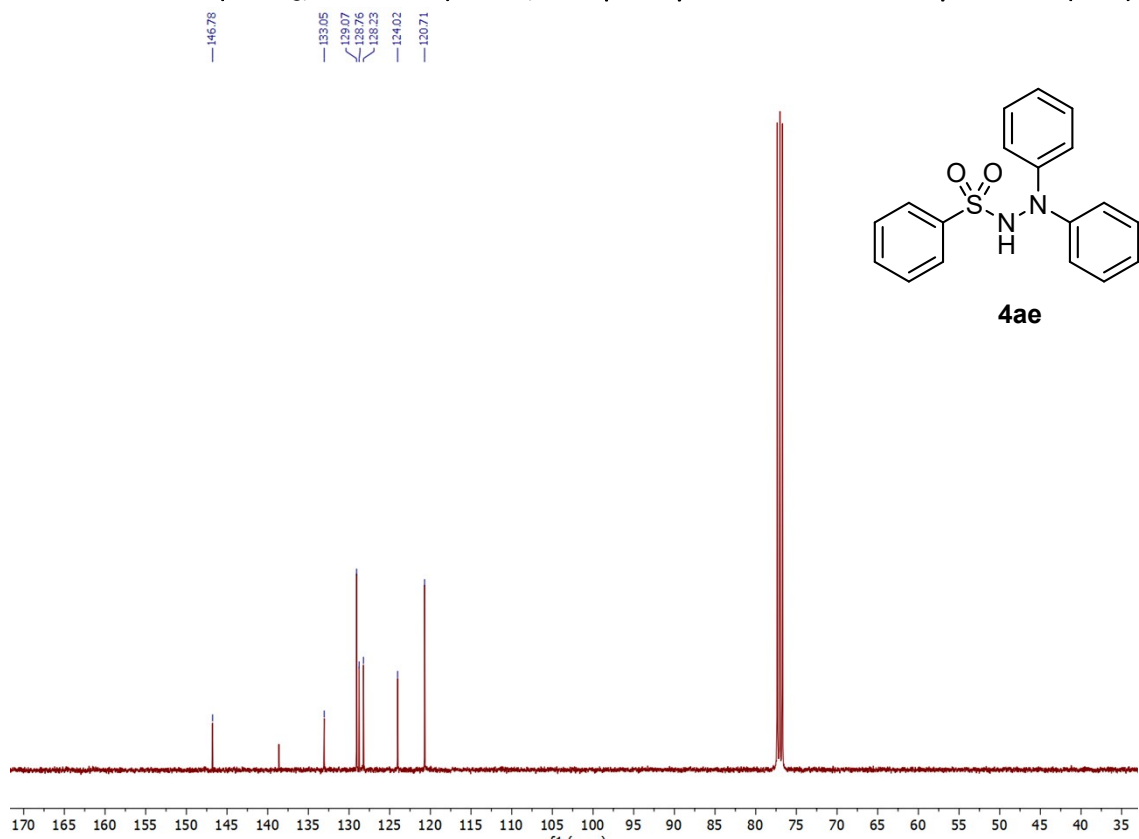

2.29.  $^1\text{H}$  NMR ( $\text{CDCl}_3$ , 400 MHz) of 4-methyl- $\text{N}'$ , $\text{N}'$ -diphenylbenzene sulfonylhydrazide (4be)

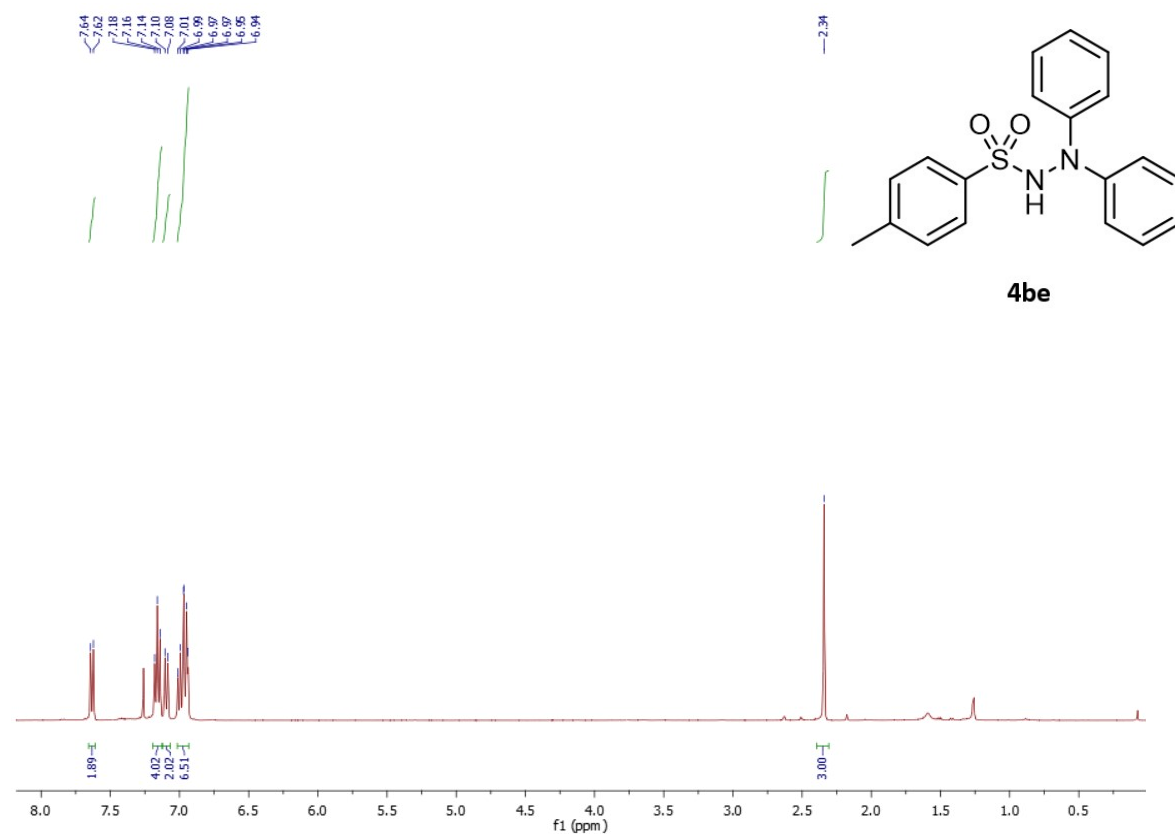

2.30.  $^{13}\text{C}$  NMR ( $\text{CDCl}_3$ , 400 MHz) of 4-methyl- $\text{N}'$ , $\text{N}'$ -diphenylbenzene sulfonylhydrazide (4be)

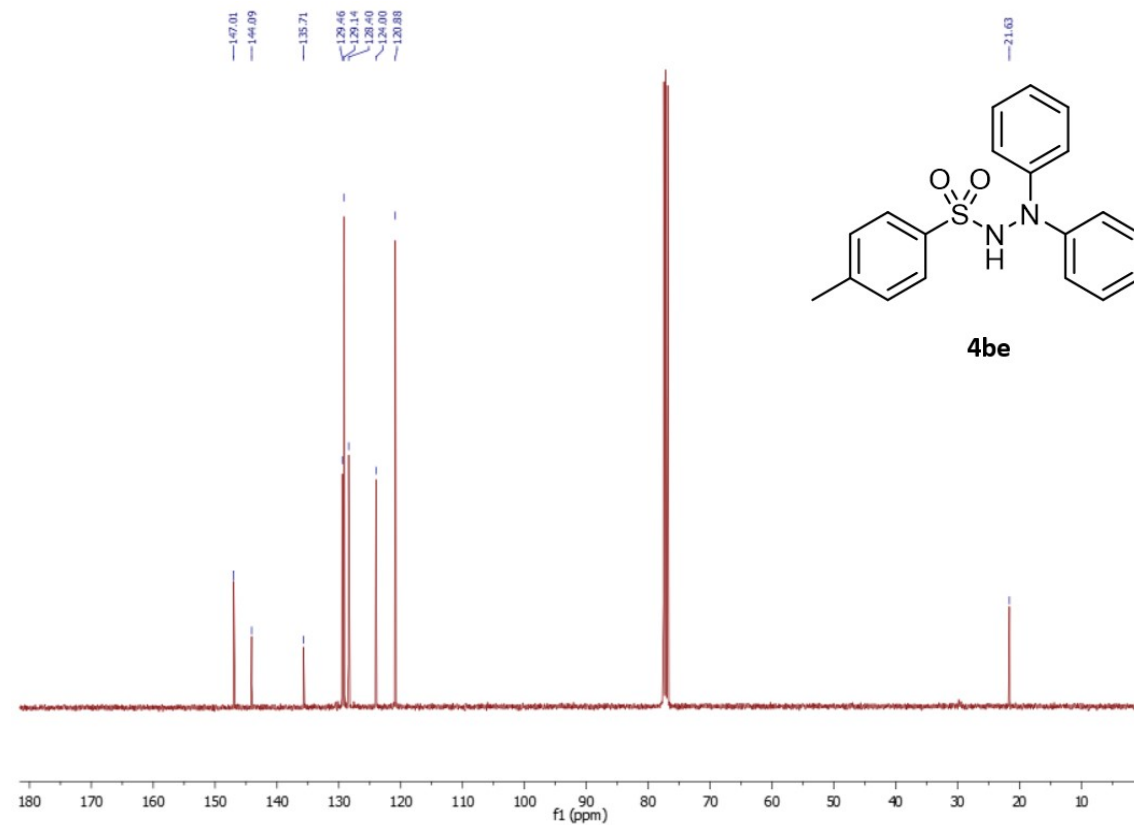

2.31.  $^1\text{H}$  NMR ( $\text{CDCl}_3$ , 400 MHz) of 1-methanesulfonyl-2-phenylhydrazine (4ce)

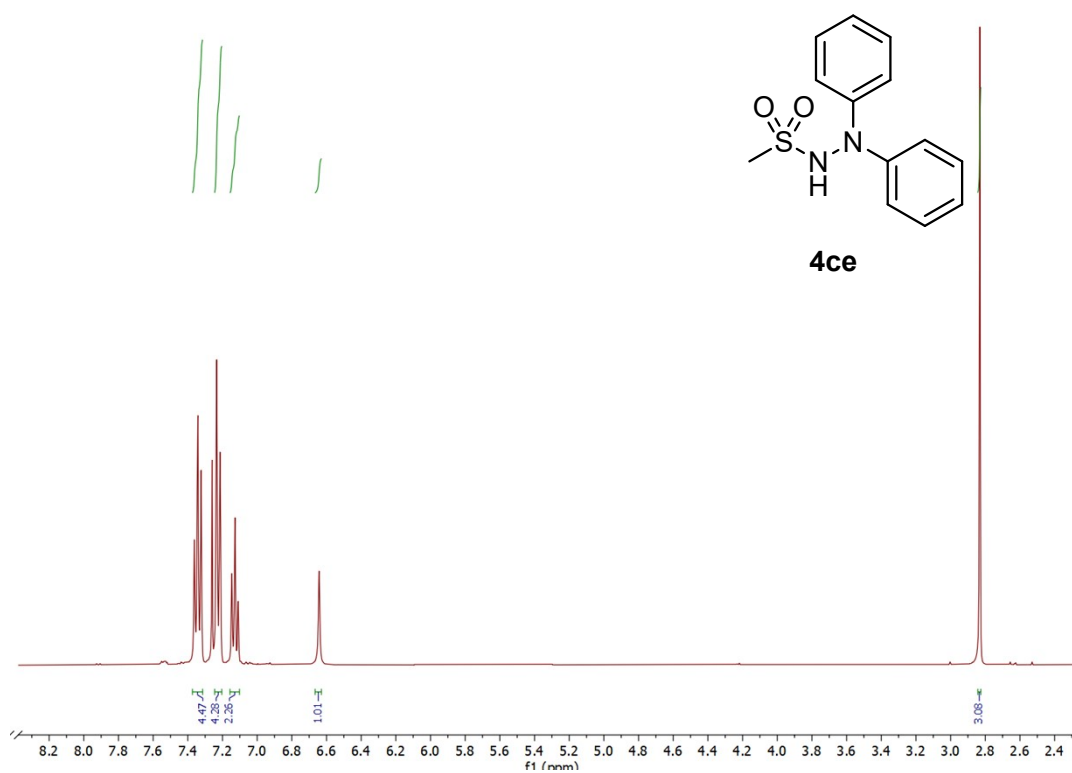

2.32.  $^{13}\text{C}$  NMR ( $\text{CDCl}_3$ , 400 MHz) of 1-methanesulfonyl-2-phenylhydrazine (4ce)

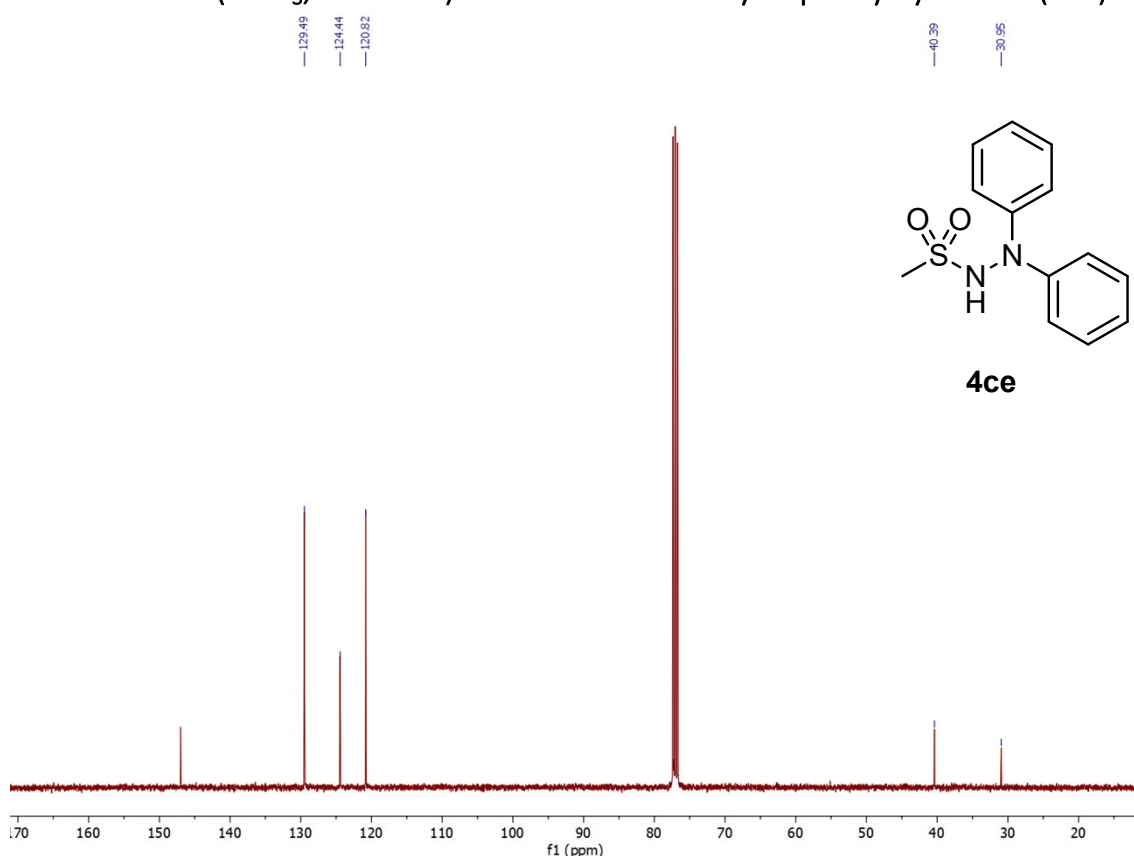

2.33.  $^1\text{H}$  NMR ( $\text{CDCl}_3$ , 400 MHz) of N'-(3-chlorophenyl)benzenesulfonylhydrazide (4af)

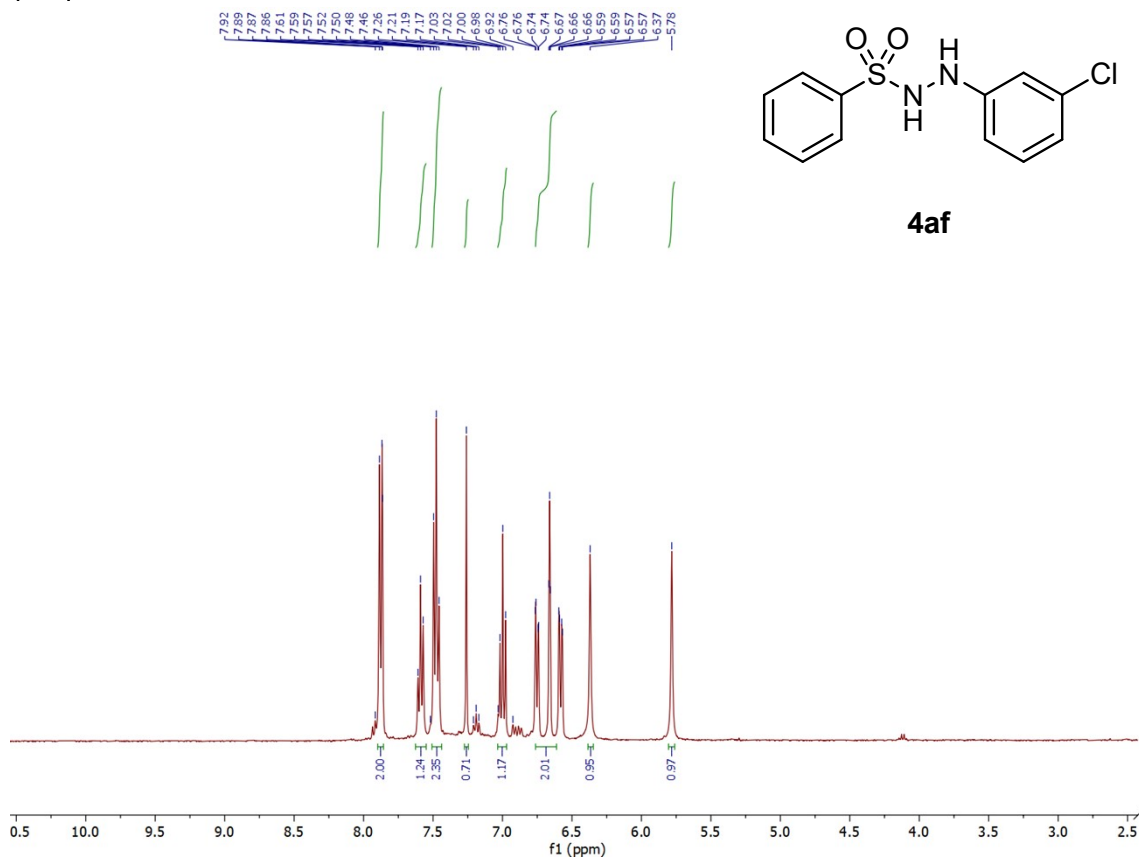

2.34.  $^{13}\text{C}$  NMR ( $\text{CDCl}_3$ , 400 MHz) of N'-(3-chlorophenyl)benzenesulfonylhydrazide (4af)

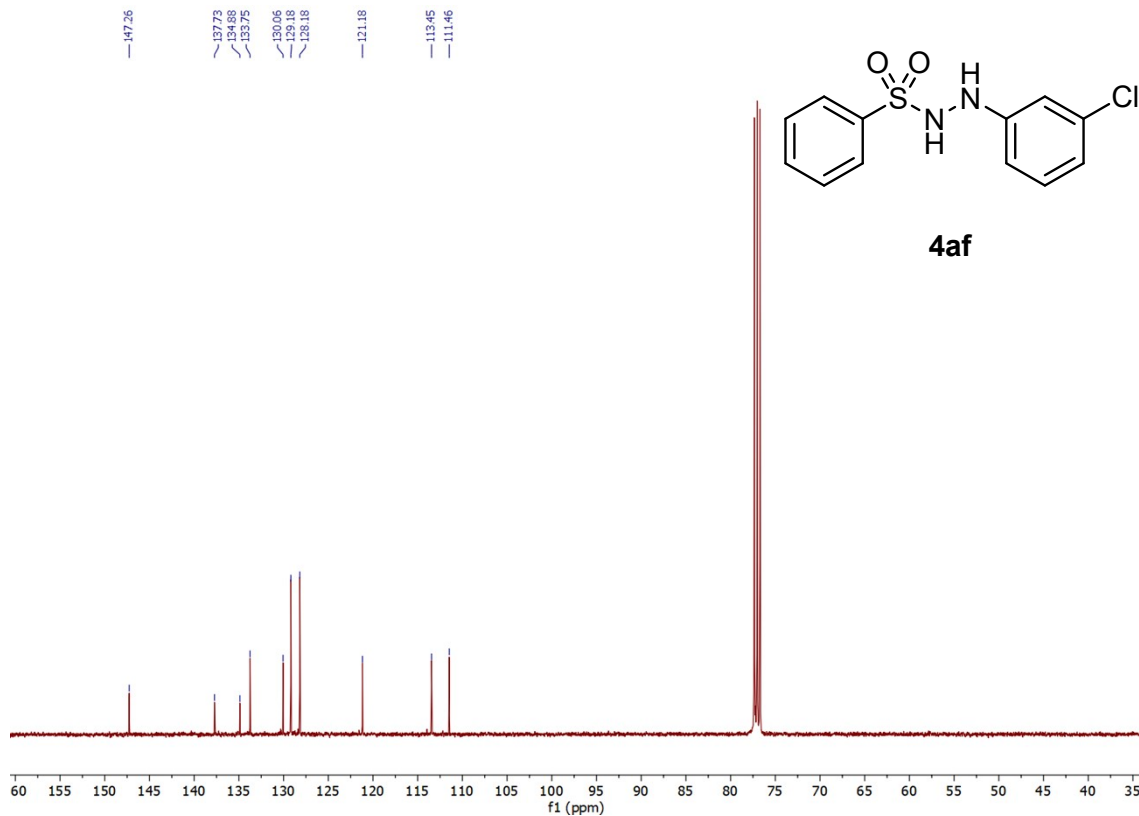

2.35.  $^1\text{H}$  NMR ( $\text{CDCl}_3$ , 400 MHz) of N'-(3-chlorophenyl)methanesulfonylhydrazide (4cf)

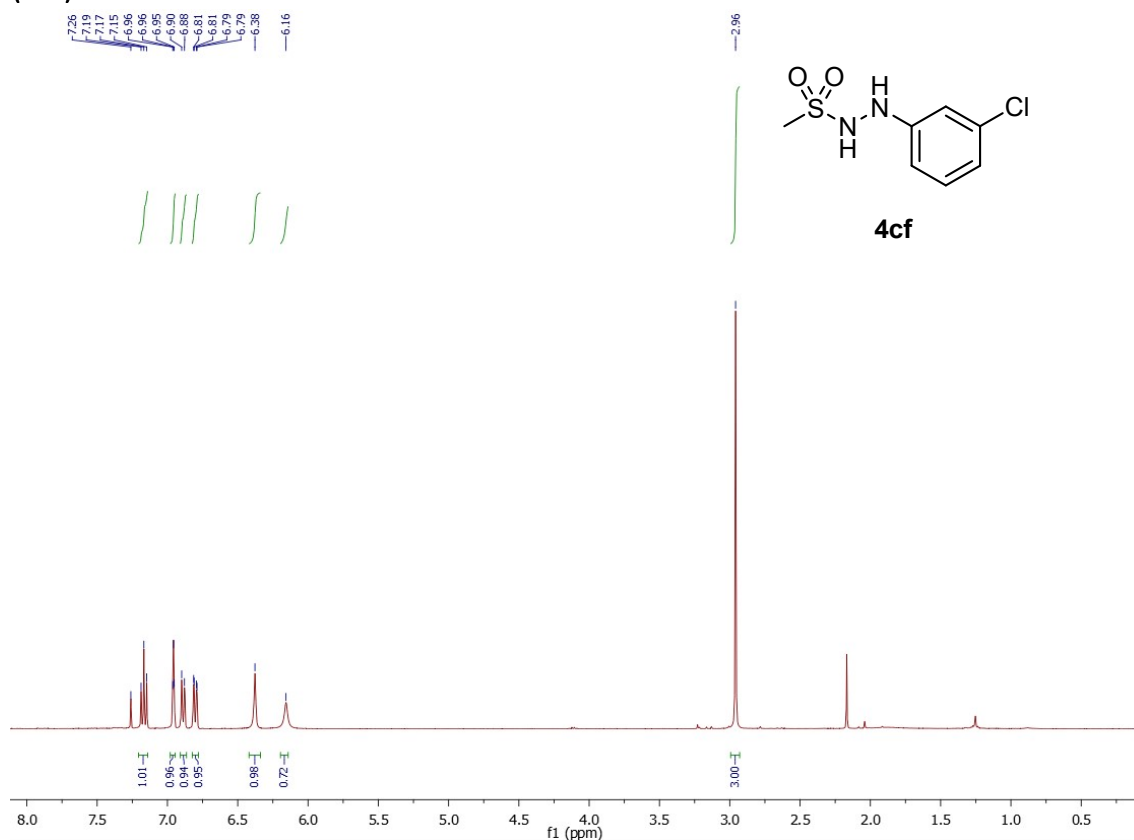

2.36.  $^{13}\text{C}$  NMR ( $\text{CDCl}_3$ , 400 MHz) of N'-(3-chlorophenyl)methanesulfonylhydrazide (4cf)

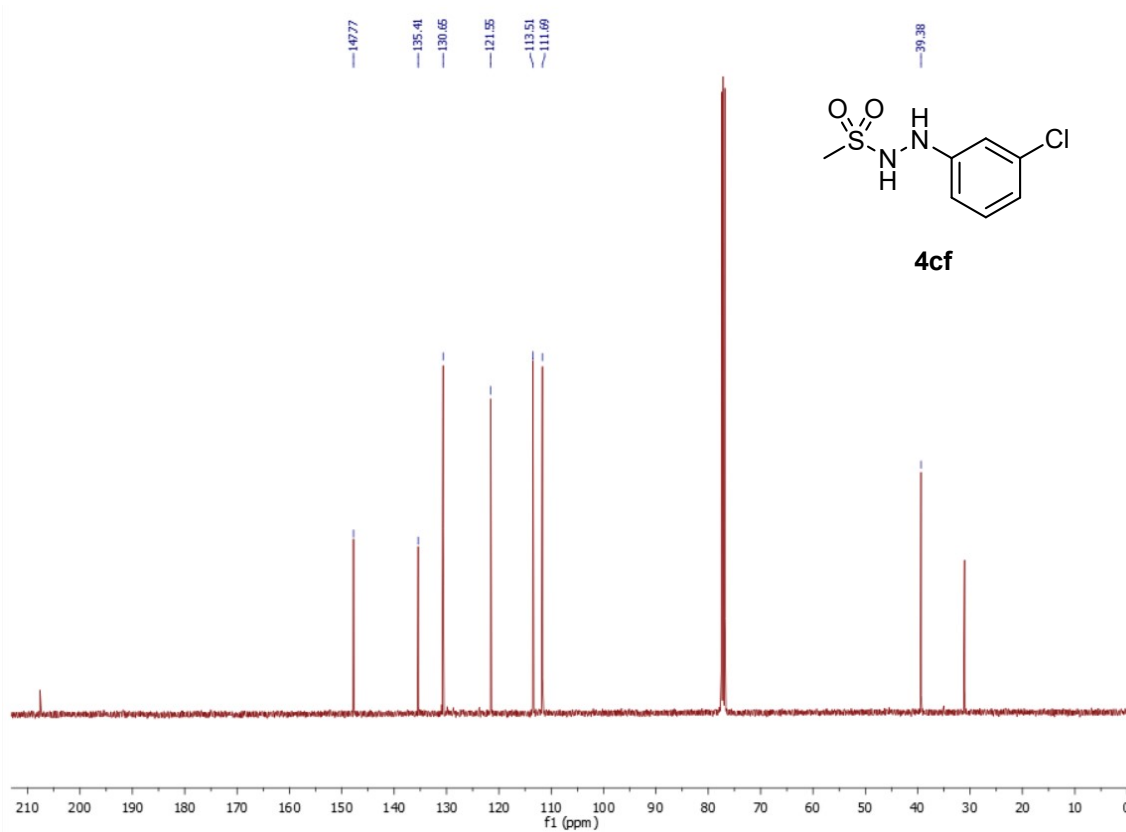



2.37.  $^1\text{H}$  NMR ( $\text{CDCl}_3$ , 400 MHz) of 4-methyl-N'-(m-tolyl)benzene sulfonohydrazide (4bg)

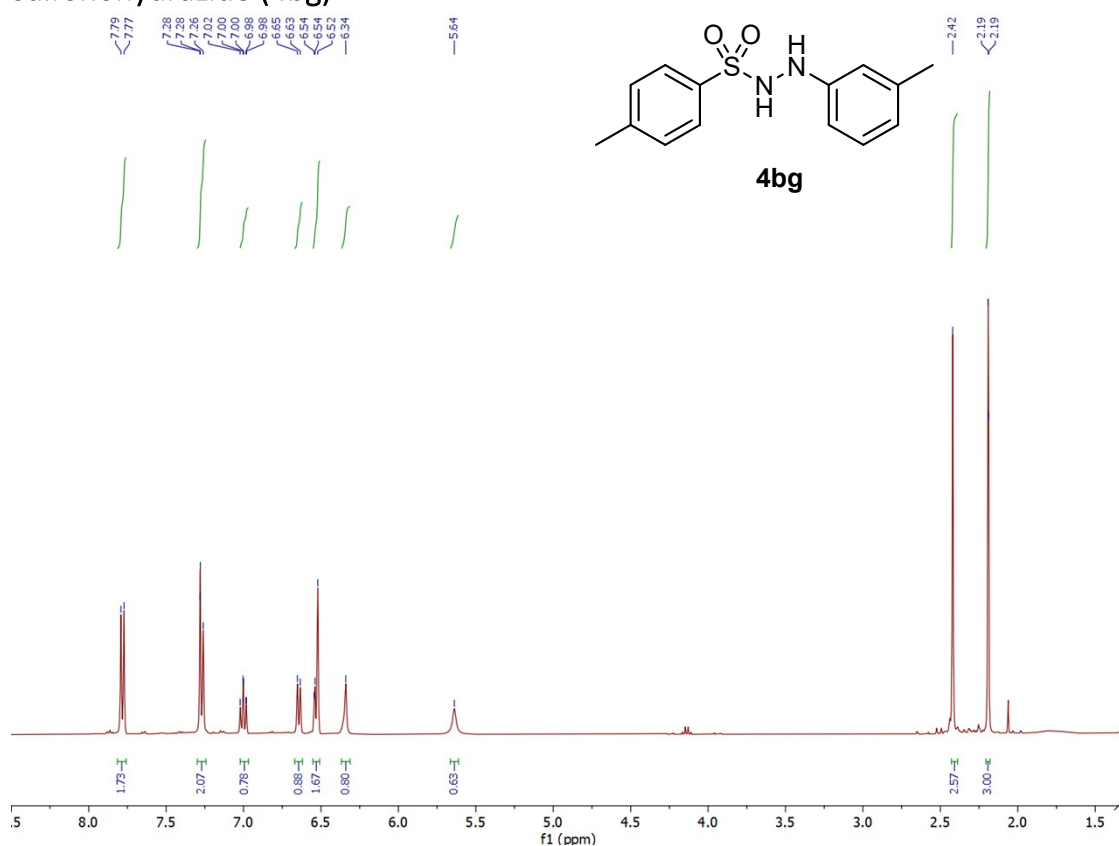

2.38.  $^{13}\text{C}$  NMR ( $\text{CDCl}_3$ , 400 MHz) of 4-methyl-N'-(m-tolyl)benzene sulfonohydrazide (4bg)

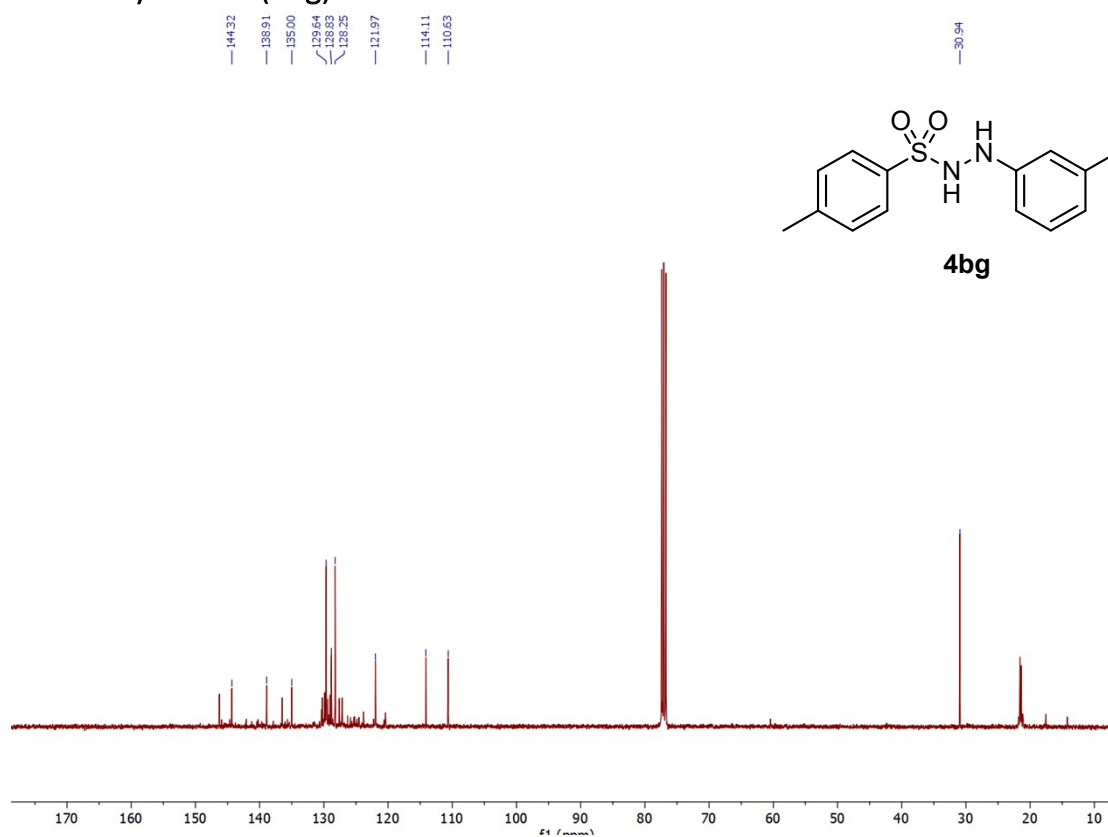

2.39. <sup>1</sup>H NMR (CDCl<sub>3</sub>, 400 MHz) of 4-(pyridin-2-ylsulfonyl)morpholine (6ea)

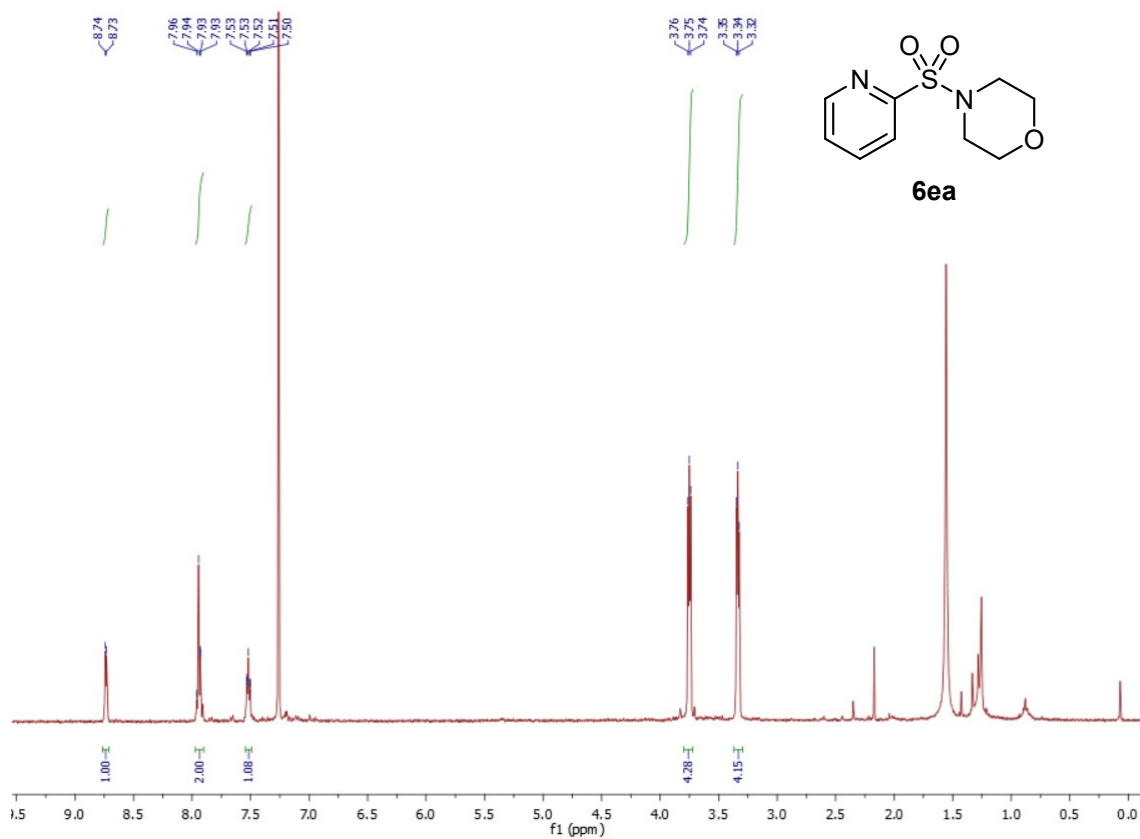

### 3. IR Spectra

#### 3.1. IR spectra of 1-chloro-1,2-benziodoxol-3-(1H)-one (1)

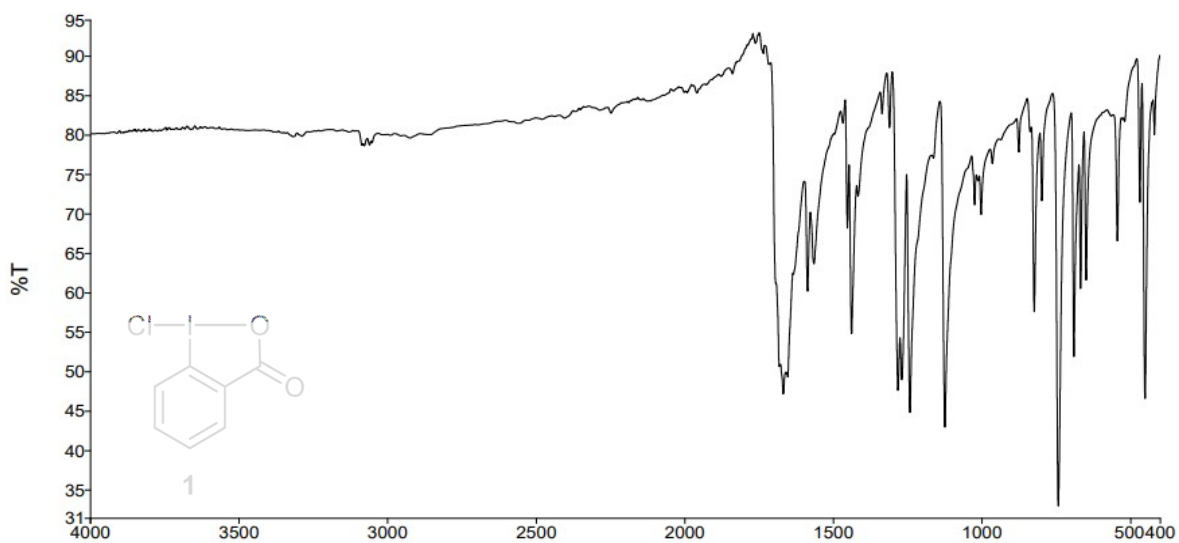

#### 3.2. IR spectra of N-morpholinobenzenesulfonamide (4aa)

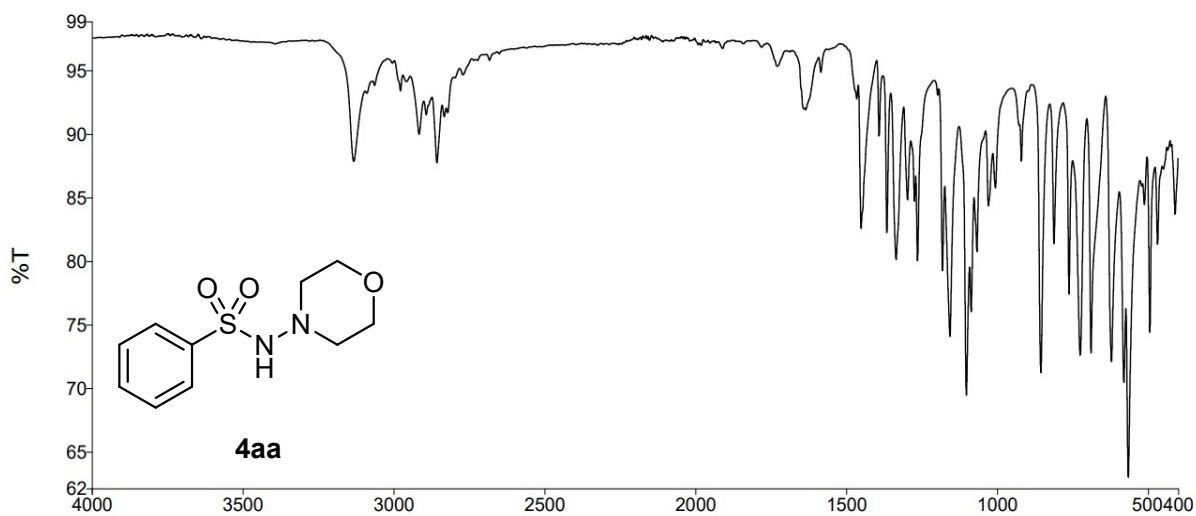

#### 3.3. IR spectra of N'-methyl-N'-phenylbenzenesulfonohydrazide (4ab)

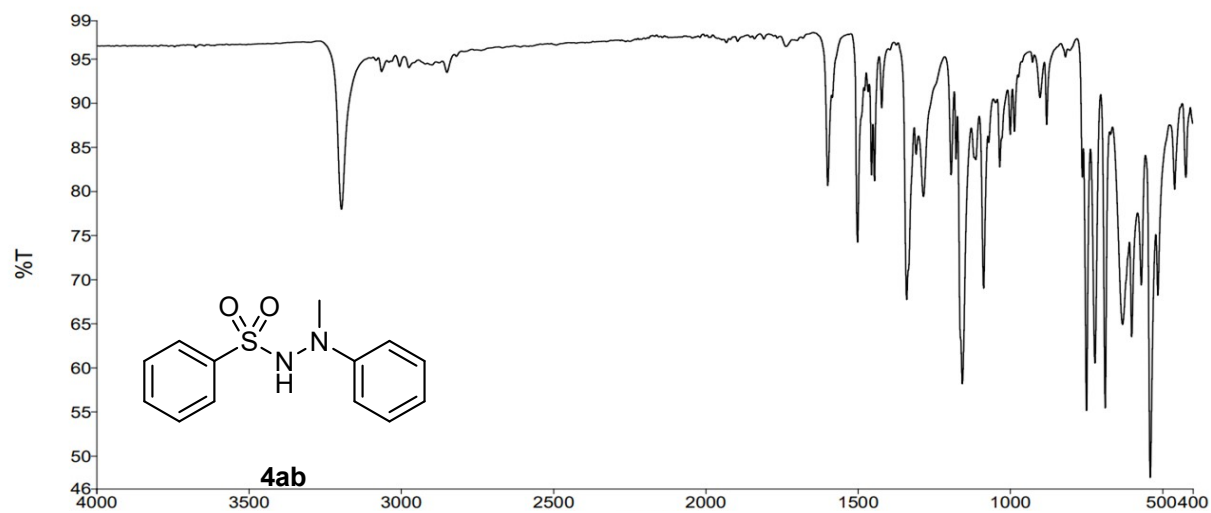

### 3.4. IR spectra of 1,2-dimorpholinodiazeno (5)

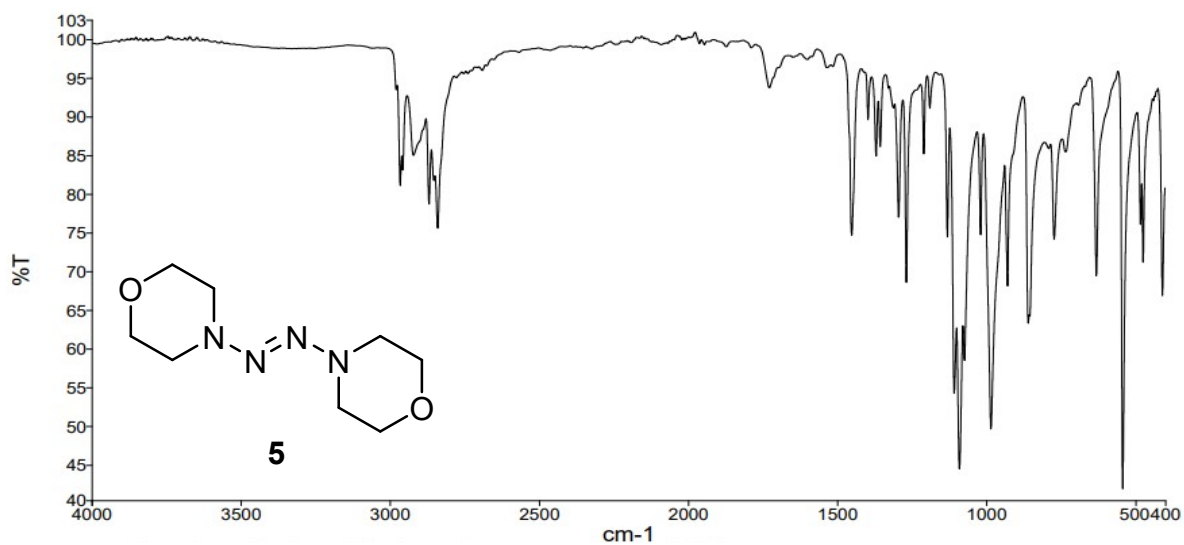

### 3.5. IR spectra of N-morpholinobenzenesulfonamide (4ba)

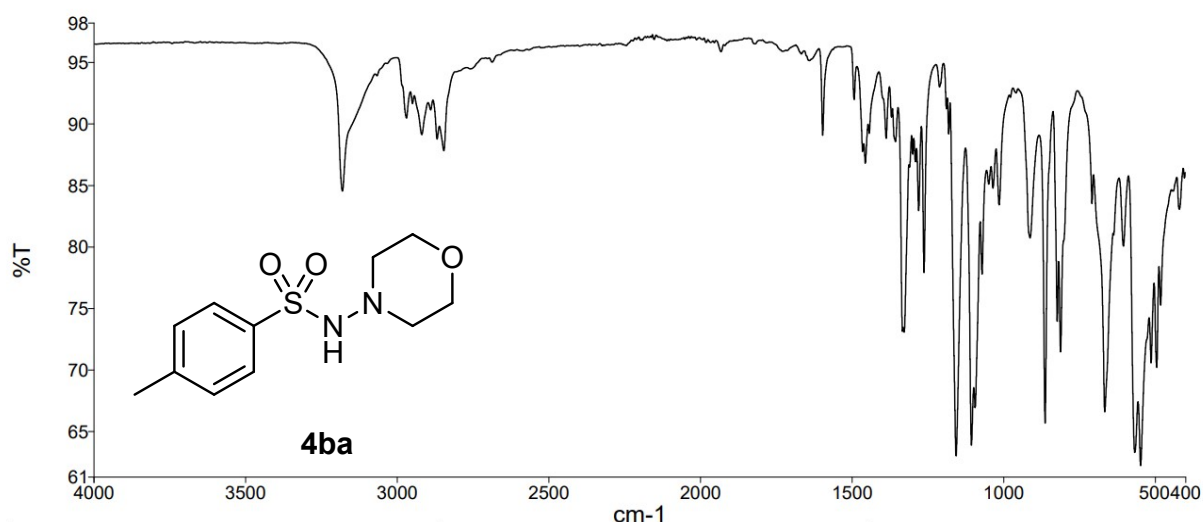

### 3.6. IR spectra of N'-Methyl-N-phenyl-N'-p-toluolsulfonyl-hydrazin (4bb)

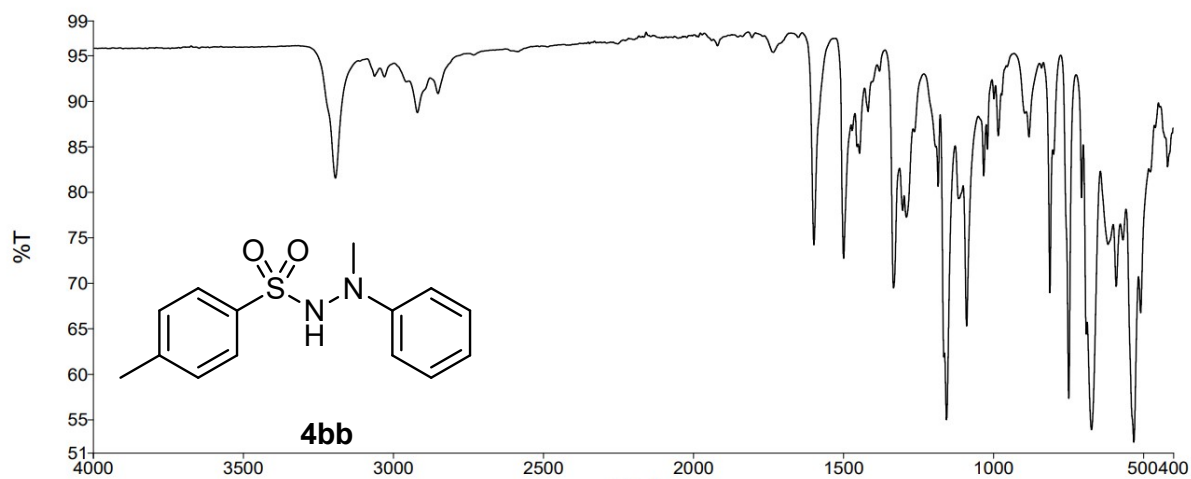

### 3.7. IR spectra of N'-methyl-N'-phenylmethanesulfonylhydrazide (4cb)

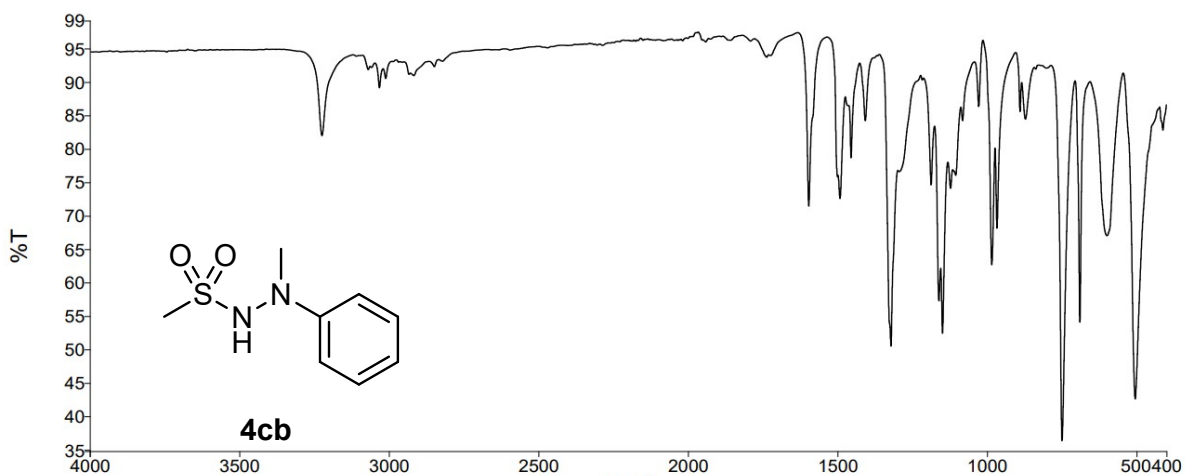

### 3.8. IR spectra of N'-methyl-N'-phenyl-naphthalene-2-sulfonylhydrazide (4db)

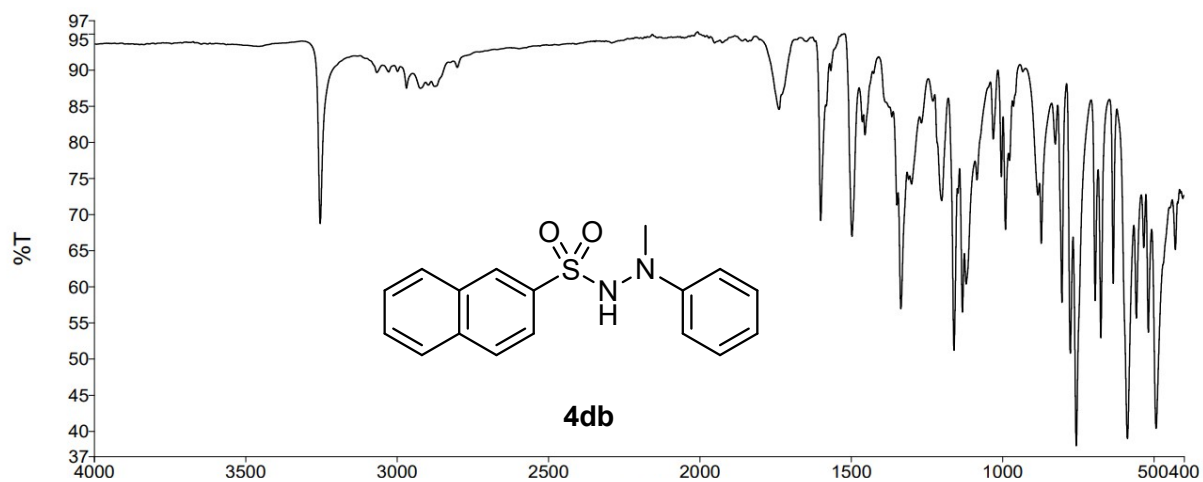

### 3.9. IR spectra of N'-methyl-N'-phenylpyridin-2-sulfonylhydrazide (4eb)

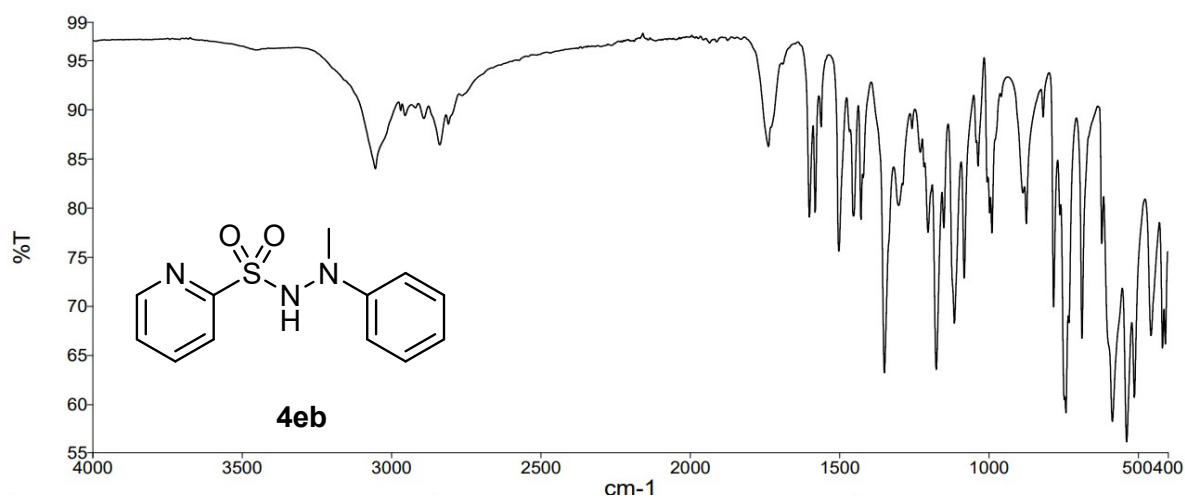

### 3.10. IR spectra of N-(piperidin-1-yl)benzenesulfonamide (4ac)

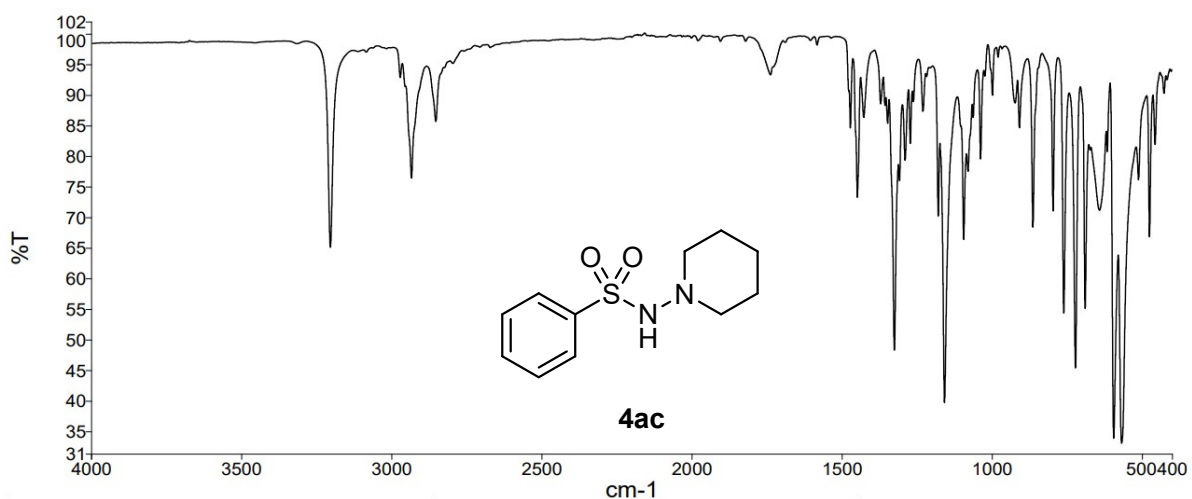

### 3.11. IR spectra of 4-methyl-N-(piperidin-1 yl) benzenesulfonamide (4bc)

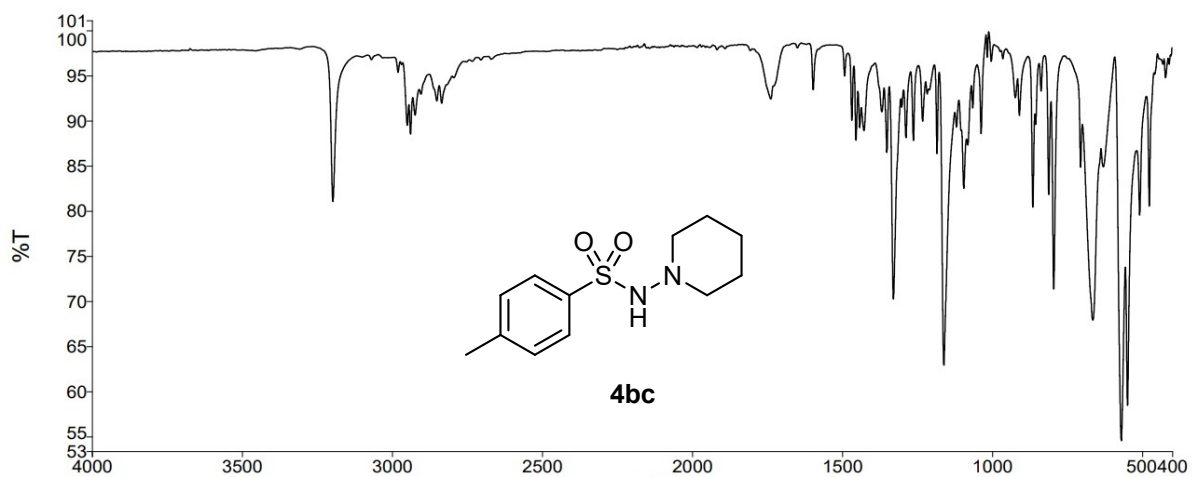

### 3.12. IR spectra of 2-Benzolsulfonyl-1,1-dimethyl-hydrazin (4ad)

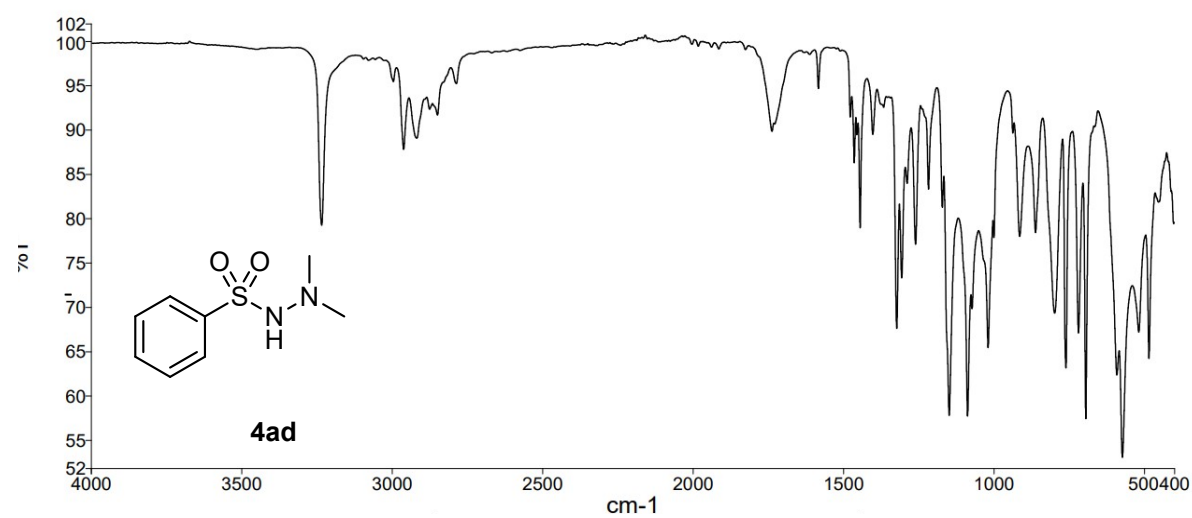

### 3.13. IR spectra of N,N-Dimethyl-4-toluenesulfonylhydrazide (4bd)

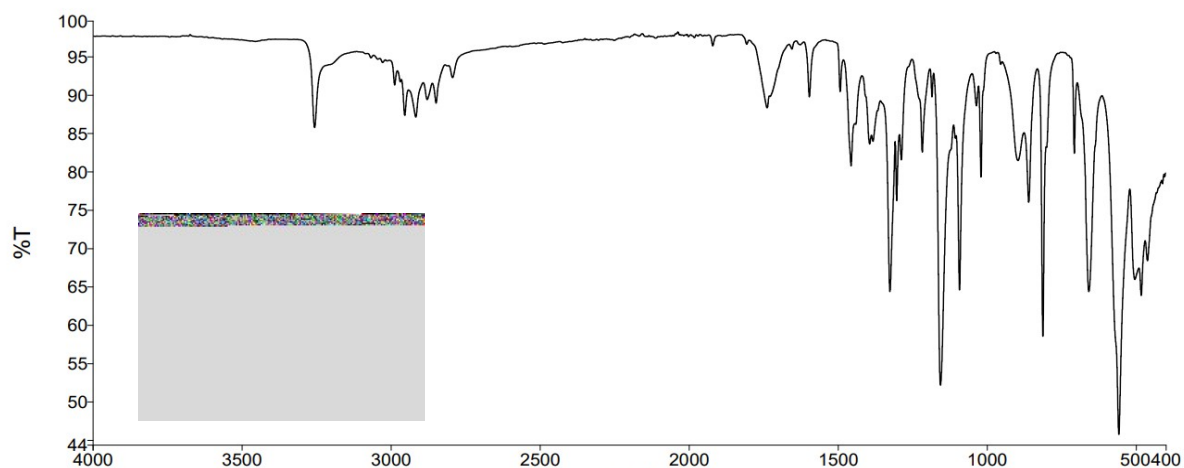

### 3.14. IR spectra of N',N'-diphenylbenzenesulfonylhydrazide (4ae)

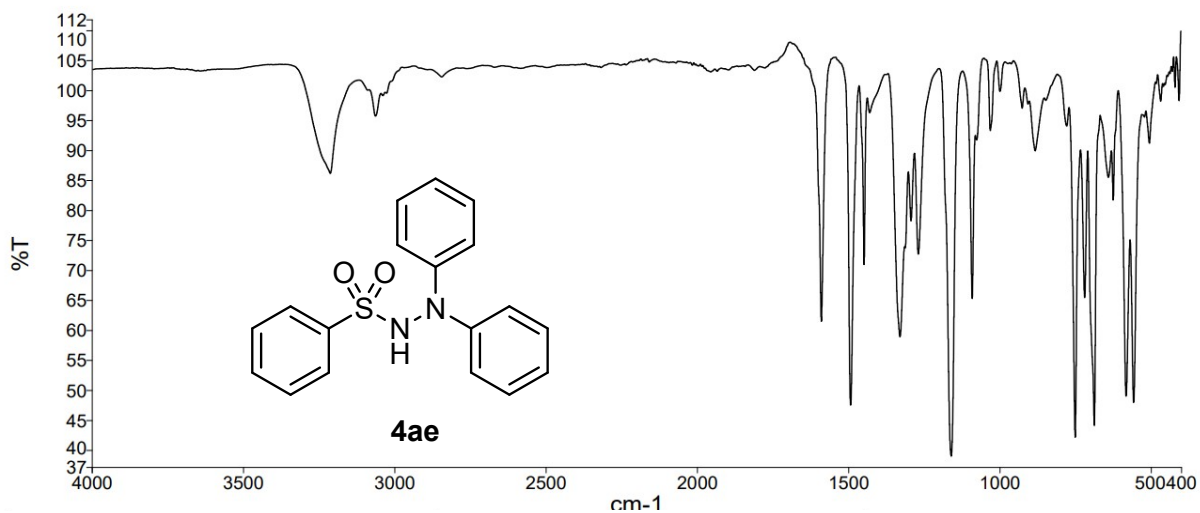

### 3.15. IR spectra of 4-methyl-N',N'-diphenylbenzenesulfonylhydrazide (4be)

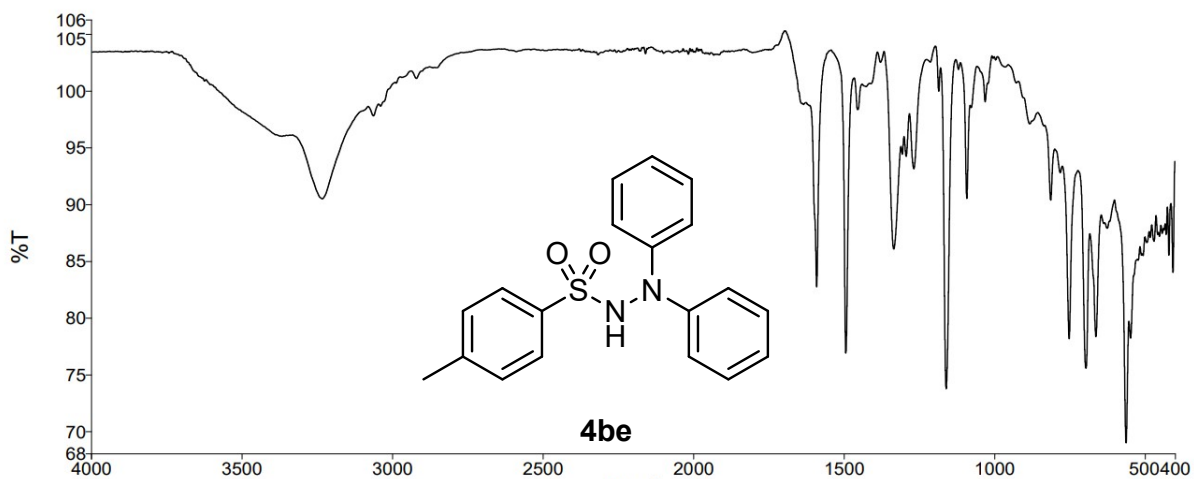

### 3.16. IR spectra of 1-methanesulfonyl-2-phenylhydrazine (4ce)

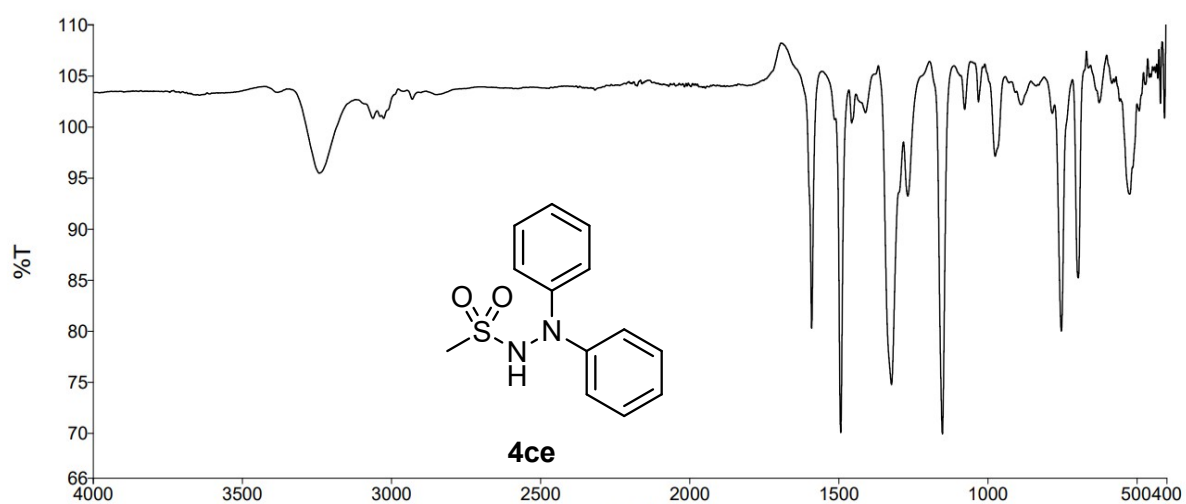

### 3.17. IR spectra of N'-(3-chlorophenyl)benzenesulfonylhydrazide (4af)

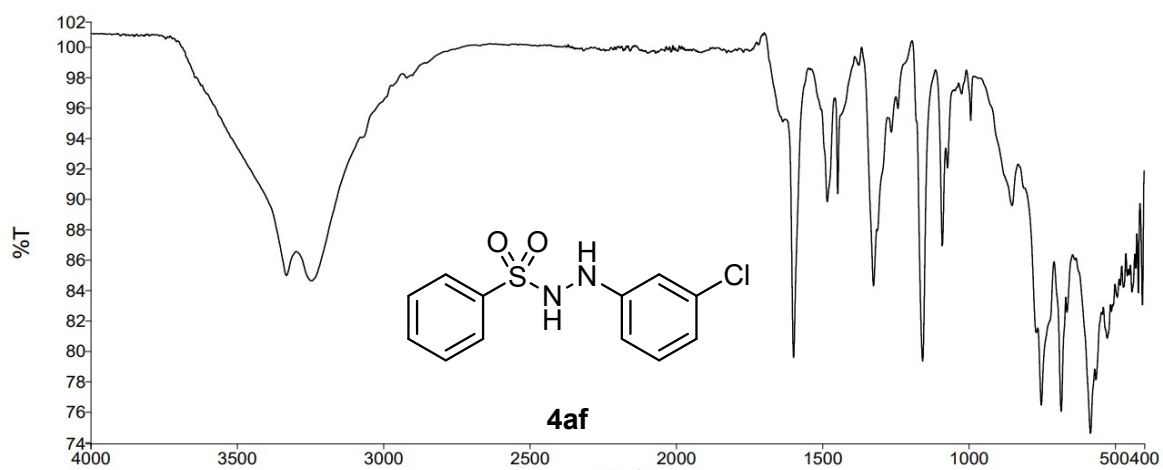

### 3.18. IR spectra of N'-(3-chlorophenyl)methanesulfonylhydrazide (4cf)

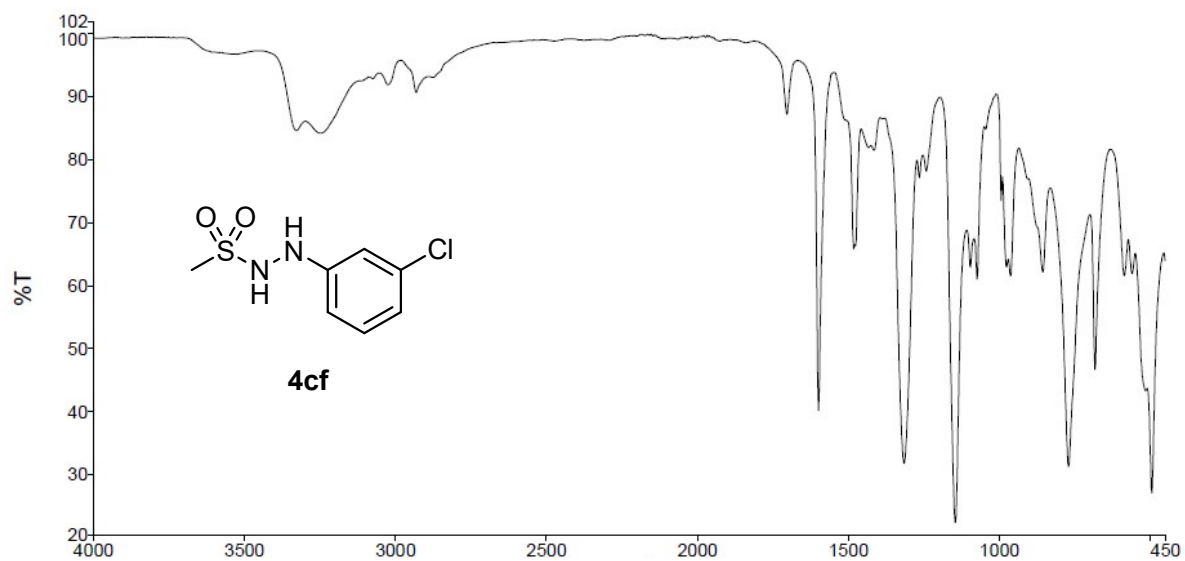



### 3.19. IR spectra of 4-methyl-N'-(m-tolyl)benzenesulfonylhydrazide (4bg)

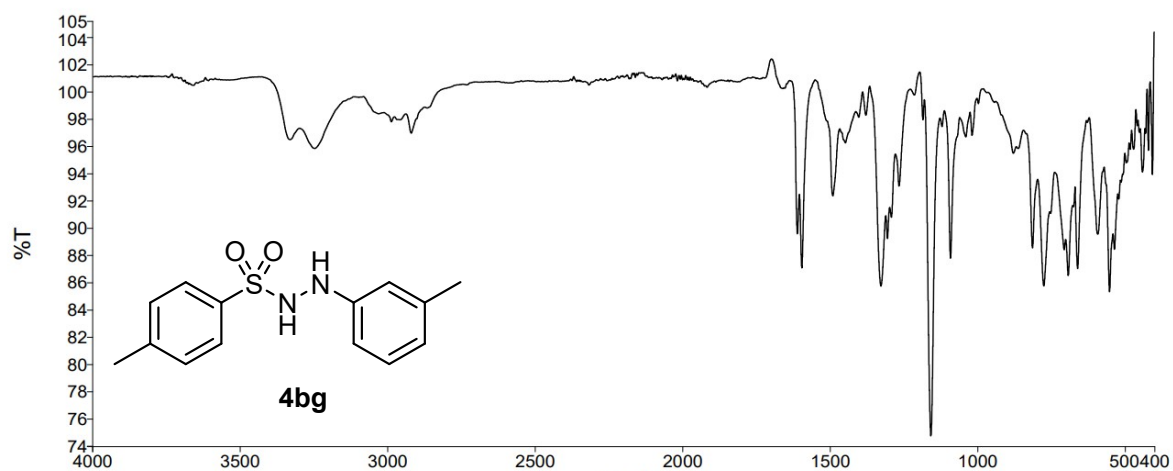

### 3.20. IR spectra of 4-(pyridin-2-ylsulfonyl)morpholine (6ea)

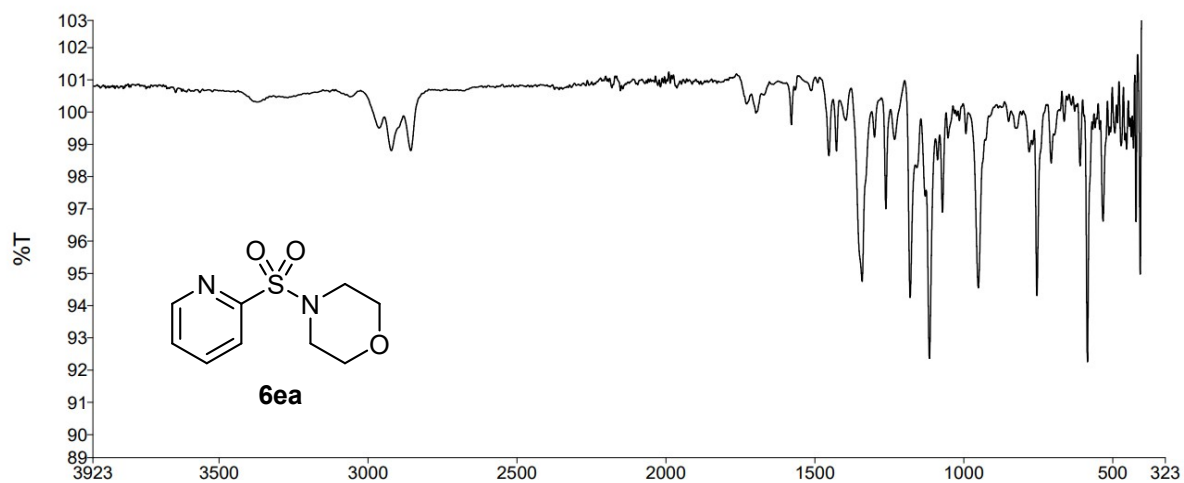

## 4. Computational details

### 4.1. Energies and Cartesian Coordinates

R

SCF energy: -1165.01304164 Hartree

Free energy correction: 0.271778 Hartree

|    |              |              |              |
|----|--------------|--------------|--------------|
| 6  | -0.717290000 | 4.584261000  | 3.058683000  |
| 6  | -0.292731000 | 3.296631000  | 2.687168000  |
| 6  | -0.986194000 | 2.581033000  | 1.698964000  |
| 6  | -2.092590000 | 3.189557000  | 1.109788000  |
| 6  | -2.537804000 | 4.466053000  | 1.454294000  |
| 6  | -1.834036000 | 5.166856000  | 2.445528000  |
| 53 | -3.152944000 | 2.116940000  | -0.401229000 |
| 8  | -4.275203000 | 4.281904000  | -0.140081000 |
| 6  | -3.750915000 | 5.071427000  | 0.763321000  |
| 8  | -4.137410000 | 6.223525000  | 1.092267000  |
| 8  | -1.963927000 | 0.552829000  | -0.256711000 |
| 16 | 1.004692000  | -0.375817000 | -0.680108000 |
| 6  | 0.424380000  | -1.878437000 | 0.243761000  |
| 6  | -0.855962000 | -1.896518000 | 0.805560000  |
| 6  | -1.240203000 | -3.046437000 | 1.513984000  |
| 6  | -0.358186000 | -4.130959000 | 1.644995000  |
| 6  | 0.921572000  | -4.079148000 | 1.068103000  |
| 6  | 1.323149000  | -2.939860000 | 0.357878000  |
| 8  | 2.613487000  | -0.688389000 | -0.957420000 |
| 7  | 0.494115000  | -1.046182000 | -2.510909000 |
| 7  | -0.602978000 | -0.524514000 | -3.151244000 |
| 1  | -0.172970000 | 5.129924000  | 3.825399000  |
| 1  | 0.576361000  | 2.849507000  | 3.162203000  |
| 1  | -0.697606000 | 1.580378000  | 1.374374000  |
| 1  | -2.193313000 | 6.160099000  | 2.703059000  |
| 1  | -1.519771000 | -1.031444000 | 0.665461000  |
| 1  | -2.228892000 | -3.091166000 | 1.963132000  |
| 1  | -0.666109000 | -5.015209000 | 2.198300000  |
| 1  | 1.600503000  | -4.921513000 | 1.173432000  |
| 1  | 2.305205000  | -2.836539000 | -0.101466000 |
| 1  | 1.382656000  | -0.731777000 | -2.947044000 |
| 6  | -0.729005000 | 0.948280000  | -3.200007000 |
| 6  | -1.889917000 | 1.334528000  | -4.114181000 |
| 8  | -3.115755000 | 0.676005000  | -3.718290000 |
| 6  | -2.953928000 | -0.765831000 | -3.743952000 |
| 6  | -1.860846000 | -1.203240000 | -2.776935000 |
| 1  | 0.208610000  | 1.370751000  | -3.584734000 |
| 1  | -0.904867000 | 1.310178000  | -2.170217000 |
| 1  | -2.087806000 | 2.407585000  | -4.053159000 |
| 1  | -1.650395000 | 1.061421000  | -5.157026000 |
| 1  | -3.920568000 | -1.184152000 | -3.453918000 |
| 1  | -2.707476000 | -1.085340000 | -4.772000000 |
| 1  | -1.682882000 | -2.281896000 | -2.829988000 |
| 1  | -2.136682000 | -0.907418000 | -1.749660000 |

TS

SCF energy: -1164.97718710 Hartree

Free energy correction: 0.271423 Hartree

Imaginary frequency: 319.9i

|    |              |             |              |
|----|--------------|-------------|--------------|
| 6  | -0.931818000 | 2.832907000 | 3.777871000  |
| 6  | 0.057346000  | 2.487392000 | 2.842898000  |
| 6  | -0.226393000 | 2.554094000 | 1.472789000  |
| 6  | -1.498107000 | 2.977268000 | 1.055529000  |
| 6  | -2.498839000 | 3.344624000 | 1.963373000  |
| 6  | -2.190405000 | 3.252101000 | 3.335648000  |
| 53 | -1.829549000 | 2.998601000 | -1.060534000 |
| 8  | -4.090825000 | 4.076618000 | 0.327579000  |
| 6  | -3.907009000 | 3.858907000 | 1.578595000  |

|    |              |              |              |
|----|--------------|--------------|--------------|
| 8  | -4.720826000 | 4.018588000  | 2.544868000  |
| 8  | -0.052496000 | 1.283877000  | -1.348533000 |
| 16 | 0.853760000  | -0.316266000 | -1.302729000 |
| 6  | 0.258448000  | -1.067887000 | 0.285577000  |
| 6  | -0.931212000 | -0.606432000 | 0.848424000  |
| 6  | -1.350963000 | -1.163478000 | 2.064032000  |
| 6  | -0.582533000 | -2.163774000 | 2.678904000  |
| 6  | 0.610356000  | -2.610883000 | 2.087743000  |
| 6  | 1.044355000  | -2.058280000 | 0.875038000  |
| 8  | 2.379547000  | -0.921250000 | -1.494043000 |
| 7  | -0.093382000 | -1.463957000 | -2.606658000 |
| 7  | -0.961807000 | -0.834354000 | -3.461873000 |
| 1  | -0.719181000 | 2.775388000  | 4.842870000  |
| 1  | 1.039500000  | 2.155195000  | 3.169382000  |
| 1  | 0.510877000  | 2.258062000  | 0.730289000  |
| 1  | -2.992286000 | 3.529271000  | 4.015979000  |
| 1  | -1.495080000 | 0.186846000  | 0.362587000  |
| 1  | -2.260644000 | -0.797986000 | 2.530711000  |
| 1  | -0.907838000 | -2.587474000 | 3.625210000  |
| 1  | 1.202108000  | -3.381690000 | 2.573734000  |
| 1  | 1.972074000  | -2.354656000 | 0.390487000  |
| 1  | 0.746594000  | -1.807146000 | -3.108162000 |
| 6  | -0.467582000 | 0.259747000  | -4.329118000 |
| 6  | -1.502233000 | 0.509242000  | -5.423462000 |
| 8  | -2.798489000 | 0.794769000  | -4.853132000 |
| 6  | -3.269037000 | -0.315073000 | -4.048807000 |
| 6  | -2.305797000 | -0.609644000 | -2.902296000 |
| 1  | 0.486942000  | -0.053556000 | -4.773140000 |
| 1  | -0.299577000 | 1.165113000  | -3.725585000 |
| 1  | -1.232769000 | 1.382440000  | -6.021997000 |
| 1  | -1.572330000 | -0.378631000 | -6.076529000 |
| 1  | -4.246780000 | -0.017535000 | -3.664848000 |
| 1  | -3.375486000 | -1.209694000 | -4.686590000 |
| 1  | -2.597695000 | -1.517471000 | -2.364622000 |
| 1  | -2.291209000 | 0.235562000  | -2.196135000 |

P

SCF energy: -1165.01273670 Hartree

Free energy correction: 0.273661 Hartree

|    |              |              |              |
|----|--------------|--------------|--------------|
| 6  | 0.906686000  | 2.221860000  | 2.646970000  |
| 6  | 0.703437000  | 2.845830000  | 1.406950000  |
| 6  | -0.595481000 | 3.192232000  | 1.016501000  |
| 6  | -1.689850000 | 2.892775000  | 1.849494000  |
| 6  | -1.519666000 | 2.216178000  | 3.068944000  |
| 6  | -0.193442000 | 1.914767000  | 3.450705000  |
| 53 | -3.576998000 | 3.539118000  | 1.063615000  |
| 8  | -3.842695000 | 1.849234000  | 3.629756000  |
| 6  | -2.635683000 | 1.683897000  | 4.009053000  |
| 8  | -2.216077000 | 1.064907000  | 5.051340000  |
| 8  | -0.616763000 | 1.470441000  | -1.707556000 |
| 16 | -0.029479000 | 0.142915000  | -0.999874000 |
| 6  | -0.998285000 | -0.308598000 | 0.494315000  |
| 6  | -2.363895000 | -0.023677000 | 0.499123000  |
| 6  | -3.095680000 | -0.369434000 | 1.641730000  |
| 6  | -2.455429000 | -0.996043000 | 2.723312000  |
| 6  | -1.082411000 | -1.276687000 | 2.676601000  |
| 6  | -0.327831000 | -0.928211000 | 1.548050000  |
| 8  | 1.553147000  | -0.002560000 | -0.696141000 |
| 7  | -0.463562000 | -1.266367000 | -2.282125000 |
| 7  | -0.824409000 | -0.817286000 | -3.526885000 |
| 1  | 1.910956000  | 1.956198000  | 2.968139000  |
| 1  | 1.536785000  | 3.052654000  | 0.741028000  |
| 1  | -0.759235000 | 3.666725000  | 0.053854000  |
| 1  | -0.095379000 | 1.402022000  | 4.405122000  |
| 1  | -2.824568000 | 0.513976000  | -0.326642000 |

|   |              |              |              |
|---|--------------|--------------|--------------|
| 1 | -4.137362000 | -0.081845000 | 1.727129000  |
| 1 | -3.012643000 | -1.183951000 | 3.634889000  |
| 1 | -0.593204000 | -1.712418000 | 3.541417000  |
| 1 | 0.747015000  | -1.080904000 | 1.497917000  |
| 1 | 0.433721000  | -1.778455000 | -2.316707000 |
| 6 | 0.110201000  | -0.019231000 | -4.348247000 |
| 6 | -0.332632000 | -0.136723000 | -5.806469000 |
| 8 | -1.708943000 | 0.278420000  | -5.965075000 |
| 6 | -2.599841000 | -0.525658000 | -5.152061000 |
| 6 | -2.233398000 | -0.423207000 | -3.672733000 |
| 1 | 1.124418000  | -0.419586000 | -4.220621000 |
| 1 | 0.100207000  | 1.030256000  | -4.018841000 |
| 1 | 0.258237000  | 0.520686000  | -6.448426000 |
| 1 | -0.219874000 | -1.181763000 | -6.143301000 |
| 1 | -3.605514000 | -0.140589000 | -5.334317000 |
| 1 | -2.542462000 | -1.579064000 | -5.474689000 |
| 1 | -2.836239000 | -1.108366000 | -3.068644000 |
| 1 | -2.381293000 | 0.605886000  | -3.309558000 |

## 5. Cytotoxicity of Compounds

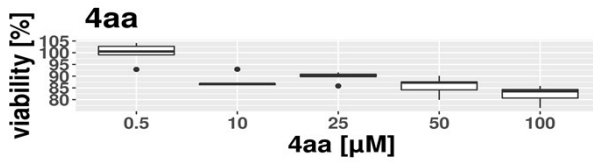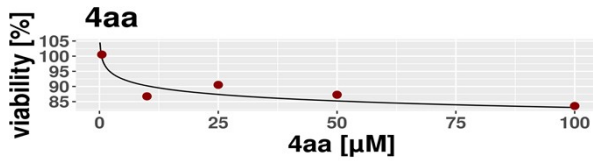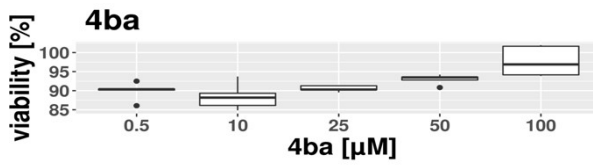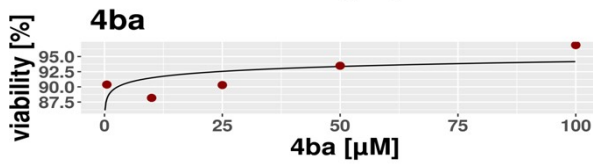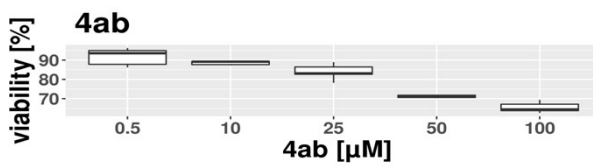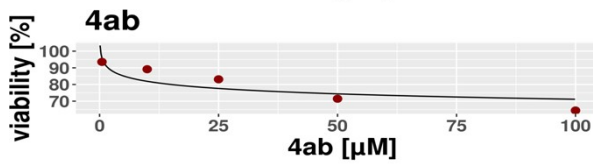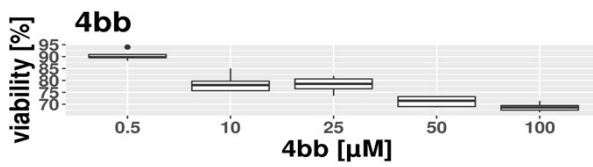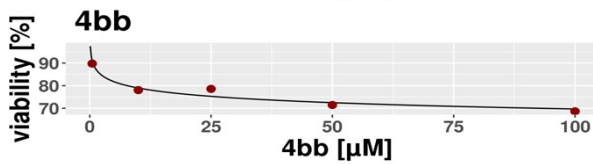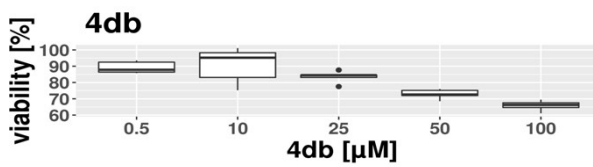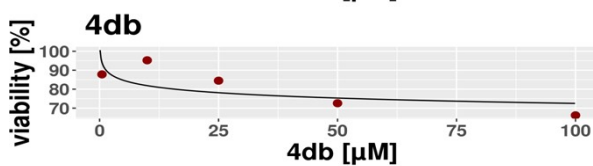

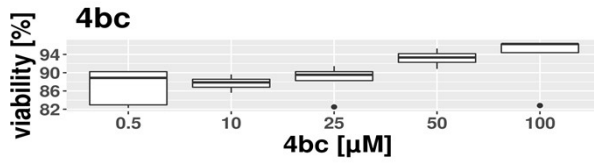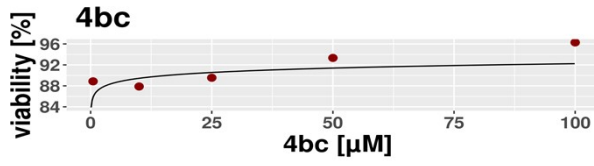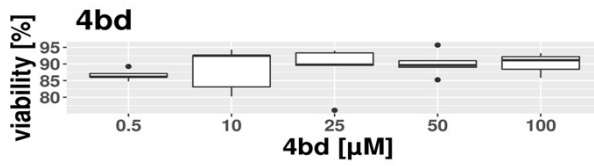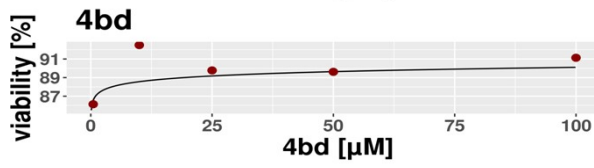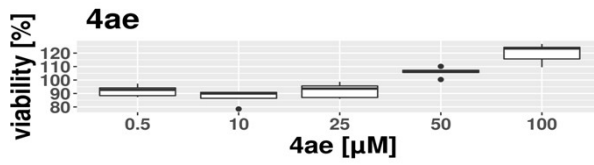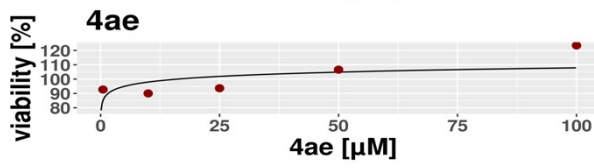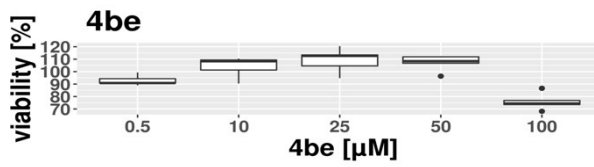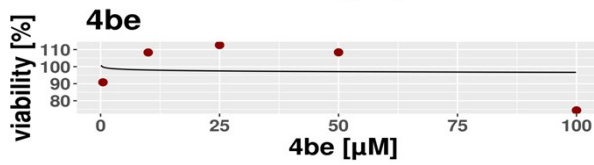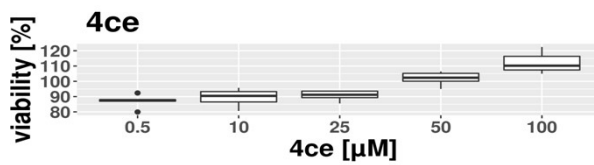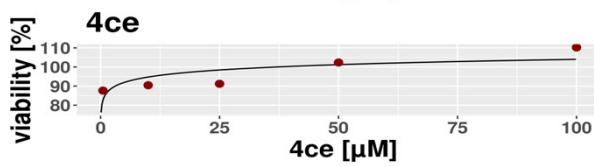

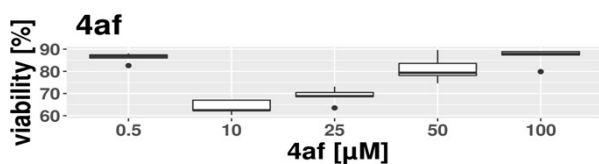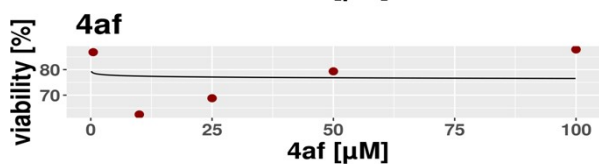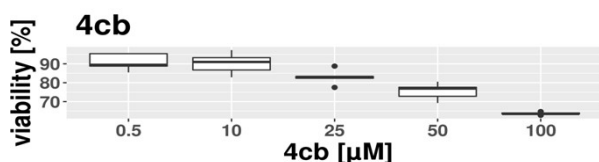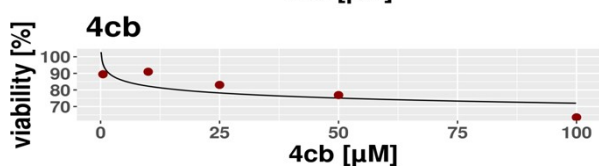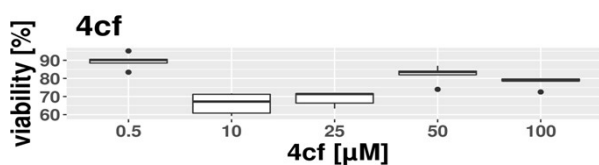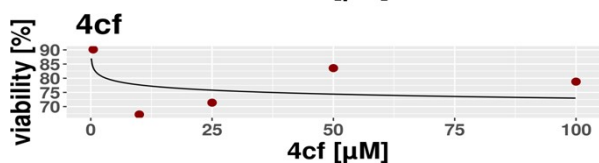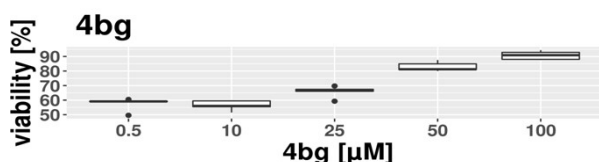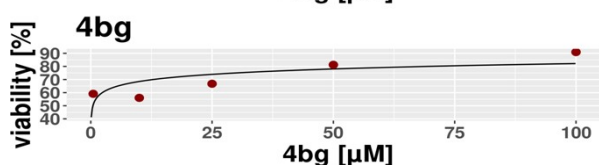

## 6. Availability of Data

The raw data for NMR analysis of the following target compounds are available through the Chemotion Repository (<https://www.chemotion-repository.net/home/>) under the collection DOI: [https://dx.doi.org/10.14272/collection/CWG\\_2022-11-23](https://dx.doi.org/10.14272/collection/CWG_2022-11-23).

|            |                                                                                                                                     |
|------------|-------------------------------------------------------------------------------------------------------------------------------------|
| <b>1</b>   | <a href="https://dx.doi.org/10.14272/XSZMFYQLHGJKKD-UHFFFAOYSA-N.1">https://dx.doi.org/10.14272/XSZMFYQLHGJKKD-UHFFFAOYSA-N.1</a>   |
| <b>4aa</b> | <a href="https://dx.doi.org/10.14272/DUAQQPBEBZYIHR-UHFFFAOYSA-N.1">https://dx.doi.org/10.14272/DUAQQPBEBZYIHR-UHFFFAOYSA-N.1</a>   |
| <b>4ba</b> | <a href="https://dx.doi.org/10.14272/CGJMIHZEFDRIIGG-UHFFFAOYSA-N.1">https://dx.doi.org/10.14272/CGJMIHZEFDRIIGG-UHFFFAOYSA-N.1</a> |
| <b>4ab</b> | <a href="https://dx.doi.org/10.14272/MVFSSJKMQUDTLZ-UHFFFAOYSA-N.1">https://dx.doi.org/10.14272/MVFSSJKMQUDTLZ-UHFFFAOYSA-N.1</a>   |
| <b>4bb</b> | <a href="https://dx.doi.org/10.14272/JILSBUZMBFCCAQ-UHFFFAOYSA-N.1">https://dx.doi.org/10.14272/JILSBUZMBFCCAQ-UHFFFAOYSA-N.1</a>   |
| <b>4ac</b> | <a href="https://dx.doi.org/10.14272/VXIQGBYMXSFXOT-UHFFFAOYSA-N.1">https://dx.doi.org/10.14272/VXIQGBYMXSFXOT-UHFFFAOYSA-N.1</a>   |
| <b>4bc</b> | <a href="https://dx.doi.org/10.14272/LPASCALNKVOUAF-UHFFFAOYSA-N.1">https://dx.doi.org/10.14272/LPASCALNKVOUAF-UHFFFAOYSA-N.1</a>   |

|            |                                                                                                                                   |
|------------|-----------------------------------------------------------------------------------------------------------------------------------|
| <b>4ad</b> | <a href="https://dx.doi.org/10.14272/SZZHGCPDOORRHU-UHFFFAOYSA-N.1">https://dx.doi.org/10.14272/SZZHGCPDOORRHU-UHFFFAOYSA-N.1</a> |
| <b>4bd</b> | <a href="https://dx.doi.org/10.14272/ZGKOFNKFGIVSDI-UHFFFAOYSA-N.1">https://dx.doi.org/10.14272/ZGKOFNKFGIVSDI-UHFFFAOYSA-N.1</a> |
| <b>4ae</b> | <a href="https://dx.doi.org/10.14272/DGBYZIRNJBIXEI-UHFFFAOYSA-N.1">https://dx.doi.org/10.14272/DGBYZIRNJBIXEI-UHFFFAOYSA-N.1</a> |
| <b>4be</b> | <a href="https://dx.doi.org/10.14272/KXAFMXACBYLEC-UHFFFAOYSA-N.1">https://dx.doi.org/10.14272/KXAFMXACBYLEC-UHFFFAOYSA-N.1</a>   |
| <b>4af</b> | <a href="https://dx.doi.org/10.14272/NQGYJZMMGBFFFC-UHFFFAOYSA-N.1">https://dx.doi.org/10.14272/NQGYJZMMGBFFFC-UHFFFAOYSA-N.1</a> |
| <b>4bg</b> | <a href="https://dx.doi.org/10.14272/WKKLJJGGWZHEKG-UHFFFAOYSA-N.1">https://dx.doi.org/10.14272/WKKLJJGGWZHEKG-UHFFFAOYSA-N.1</a> |
| <b>4cb</b> | <a href="https://dx.doi.org/10.14272/CNJKVABMOKYTFU-UHFFFAOYSA-N.1">https://dx.doi.org/10.14272/CNJKVABMOKYTFU-UHFFFAOYSA-N.1</a> |
| <b>4db</b> | <a href="https://dx.doi.org/10.14272/NZAOAPIMAXEJGE-UHFFFAOYSA-N.1">https://dx.doi.org/10.14272/NZAOAPIMAXEJGE-UHFFFAOYSA-N.1</a> |
| <b>4ce</b> | <a href="https://dx.doi.org/10.14272/RUXSYRLQWWZKD-UHFFFAOYSA-N.1">https://dx.doi.org/10.14272/RUXSYRLQWWZKD-UHFFFAOYSA-N.1</a>   |
| <b>4cf</b> | <a href="https://dx.doi.org/10.14272/JJOSXMIVEFQUSL-UHFFFAOYSA-N.1">https://dx.doi.org/10.14272/JJOSXMIVEFQUSL-UHFFFAOYSA-N.1</a> |
| <b>4eb</b> | <a href="https://dx.doi.org/10.14272/BOGYCZNODBDFD-UHFFFAOYSA-N.1">https://dx.doi.org/10.14272/BOGYCZNODBDFD-UHFFFAOYSA-N.1</a>   |
